# Supplementary material for: Silver-catalyzed decarboxylative radical cascade cyclization toward benzimidazo[2,1-a]isoquinolin-6(5H)-ones
Source: Royal Society of Chemistry journal article supplement (doi:10.1039/c8cc10243k), 2019-01-01
Supplement: c8cc10243k1.pdf [file c8cc10243k1.pdf]

## Supporting Information

### Silver-Catalyzed Decarboxylative Radical Cascade Cyclization towards Benzimidazo[2,1-*a*]isoquinolin-6(5*H*)-ones

Kai Sun,<sup>a,#</sup> Shi-Jun Li,<sup>a,#</sup> Xiao-Lan Chen,<sup>a,c,\*</sup> Yan Liu,<sup>a</sup> Xian-Qiang Huang,<sup>b</sup> Dong-Hui Wei,<sup>a,\*</sup> Ling-Bo Qu,<sup>a</sup> Yu-Fen Zhao,<sup>a,c</sup> and Bing Yu<sup>a,\*</sup>

<sup>a</sup> College of Chemistry and Molecular Engineering, Zhengzhou University, Zhengzhou 450001, China.

<sup>b</sup> School of Chemistry & Chemical Engineering, Liaocheng University, Liaocheng, Shandong 252059, China

<sup>c</sup> The Key Laboratory for Chemical Biology of Fujian Province, Xiamen University, Xiamen 361005, China

*E-mail:* chenxl@zzu.edu.cn; donghuiwei@zzu.edu.cn; bingyu@zzu.edu.cn

### Table of Contents

|                                                   |                |
|---------------------------------------------------|----------------|
| <b>1. General Information .....</b>               | <b>S2</b>      |
| <b>2. Condition Optimization .....</b>            | <b>S2-S3</b>   |
| <b>3. Experimental Procedures.....</b>            | <b>S3-S5</b>   |
| <b>4. Characterization Data for Products.....</b> | <b>S6-S12</b>  |
| <b>5. NMR Copies of Products.....</b>             | <b>S13-S38</b> |
| <b>6. X-ray Crystallographic Data of 3a.....</b>  | <b>S39</b>     |
| <b>7. Computational Details .....</b>             | <b>S39-49</b>  |

## 1. General Information

All the chemicals were purchased from commercial sources and used without treatment. Reactions were monitored by Thin Layer Chromatography (TLC) using silica gel F254 plates. Products were purified by column chromatography by using 200-300 mesh silica gel as the stationary phase. All the  $^1\text{H}$  and  $^{13}\text{C}$  NMR spectra were recorded on a Bruker Ascend 400 spectrometer at 25 °C operating at 400.13 and 100.61 MHz, respectively. Proton chemical shifts  $\delta$  were given in ppm using TMS as the internal standard. High-resolution mass spectra (HRMS) were obtained with 3000-mass spectrometer, using Waters Q-ToF MS/MS system (ESI).

## 2. Condition Optimization

We initiated our study by evaluating the model reaction of *N*-methacryloyl-2-phenylbenzimidazole (**1a**) with pivalic acid (**2a**) under different reaction conditions (Table S1). To our delight, the treatment of **1a** with 2 equiv. of **2a** in the presence of 10 mol% of  $\text{AgNO}_3$  and 2 equiv. of  $\text{K}_2\text{S}_2\text{O}_8$  in  $\text{CH}_3\text{CN}/\text{H}_2\text{O}$  (v/v = 1/1) under a  $\text{N}_2$  atmosphere at 80 °C for 8 h, afforded a desired benzimidazo[2,1-*a*]isoquinolin-6(*5H*)-one (**3a**) in 62% yield (entry 1). The structure of **3a** was further confirmed by X-ray crystallography. With this intriguing result in hand, we further examined other silver catalysts including  $\text{AgOAc}$ ,  $\text{AgSbF}_6$ ,  $\text{Ag}_2\text{CO}_3$  and  $\text{Ag}_2\text{O}$  under identical conditions. It was found that these silver catalysts were active for this decarboxylative cascade reaction, giving **3a** in yields of 50-58% (entries 2-5). Then various transition metals such as  $\text{CuI}$ ,  $\text{CuCl}$ ,  $\text{CuBr}$ ,  $\text{CuSO}_4$ ,  $\text{Fe}(\text{NO}_3)_3$ ,  $\text{FeSO}_4$ ,  $\text{NiCl}_2$  and  $\text{MnSO}_4$  as catalysts were surveyed, and however, no desired product was detected (entries 6-13). Therefore,  $\text{AgNO}_3$  was selected as the catalyst for further optimization. It was observed that the yield of **3a** increased from 40% to 79% as the dosage of  $\text{AgNO}_3$  increased from 5 mol% to 15 mol% (entries 14 and 15). The screening of oxidants showed that  $\text{K}_2\text{S}_2\text{O}_8$  was the best choice (entries 16-19). The experiments from entries 20-21 indicated that no product could be produced in the absence of  $\text{AgNO}_3$  or  $\text{K}_2\text{S}_2\text{O}_8$ . Further increasing the amount of  $\text{K}_2\text{S}_2\text{O}_8$  to 3 equivalents improved the yield to 82% (entry 22). The screening of solvents showed that  $\text{CH}_3\text{CN}/\text{H}_2\text{O}$  (v/v = 1:1) was the best choice among the solvents tested (entries 24-27). Therefore, the optimal reaction conditions were thus established as follows: **1a** (0.5 mmol), **2a** (1 mmol),  $\text{AgNO}_3$  (15 mol%) and  $\text{K}_2\text{S}_2\text{O}_8$  (3 equiv.) in the mixed solvent of  $\text{CH}_3\text{CN}/\text{H}_2\text{O}$  (v/v = 1/1) at 80 °C for 8 h under a  $\text{N}_2$  atmosphere.

**Table S1. Optimization of the reaction conditions<sup>a</sup>**

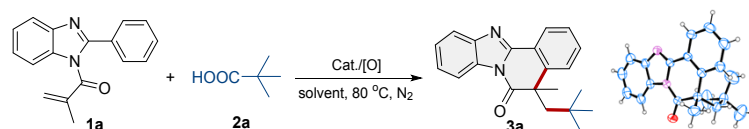

| Entry           | Cat. (mol%)                            | Oxidant (equiv)                                    | Solvent (v/v= 1:1)                     | Yield <sup>b</sup> (%) |
|-----------------|----------------------------------------|----------------------------------------------------|----------------------------------------|------------------------|
| 1               | AgNO <sub>3</sub> (10)                 | K <sub>2</sub> S <sub>2</sub> O <sub>8</sub> (2)   | CH <sub>3</sub> CN/H <sub>2</sub> O    | 62                     |
| 2               | AgOAc (10)                             | K <sub>2</sub> S <sub>2</sub> O <sub>8</sub> (2)   | CH <sub>3</sub> CN/H <sub>2</sub> O    | 58                     |
| 3               | AgSbF <sub>6</sub> (10)                | K <sub>2</sub> S <sub>2</sub> O <sub>8</sub> (2)   | CH <sub>3</sub> CN/H <sub>2</sub> O    | 50                     |
| 4               | Ag <sub>2</sub> CO <sub>3</sub> (10)   | K <sub>2</sub> S <sub>2</sub> O <sub>8</sub> (2)   | CH <sub>3</sub> CN/H <sub>2</sub> O    | 55                     |
| 5               | Ag <sub>2</sub> O (10)                 | K <sub>2</sub> S <sub>2</sub> O <sub>8</sub> (2)   | CH <sub>3</sub> CN/H <sub>2</sub> O    | 53                     |
| 6               | CuI (10)                               | K <sub>2</sub> S <sub>2</sub> O <sub>8</sub> (2)   | CH <sub>3</sub> CN/H <sub>2</sub> O    | N.D.                   |
| 7               | CuCl (10)                              | K <sub>2</sub> S <sub>2</sub> O <sub>8</sub> (2)   | CH <sub>3</sub> CN/H <sub>2</sub> O    | N.D.                   |
| 8               | CuBr (10)                              | K <sub>2</sub> S <sub>2</sub> O <sub>8</sub> (2)   | CH <sub>3</sub> CN/H <sub>2</sub> O    | N.D.                   |
| 9               | CuSO <sub>4</sub> (10)                 | K <sub>2</sub> S <sub>2</sub> O <sub>8</sub> (2)   | CH <sub>3</sub> CN/H <sub>2</sub> O    | N.D.                   |
| 10              | Fe(NO <sub>3</sub> ) <sub>3</sub> (10) | K <sub>2</sub> S <sub>2</sub> O <sub>8</sub> (2)   | CH <sub>3</sub> CN/H <sub>2</sub> O    | N.D.                   |
| 11              | FeSO <sub>4</sub> (10)                 | K <sub>2</sub> S <sub>2</sub> O <sub>8</sub> (2)   | CH <sub>3</sub> CN/H <sub>2</sub> O    | N.D.                   |
| 12              | NiCl <sub>2</sub> (10)                 | K <sub>2</sub> S <sub>2</sub> O <sub>8</sub> (2)   | CH <sub>3</sub> CN/H <sub>2</sub> O    | N.D.                   |
| 13              | MnSO <sub>4</sub> (10)                 | K <sub>2</sub> S <sub>2</sub> O <sub>8</sub> (2)   | CH <sub>3</sub> CN/H <sub>2</sub> O    | N.D.                   |
| 14              | AgNO <sub>3</sub> (5)                  | K <sub>2</sub> S <sub>2</sub> O <sub>8</sub> (2)   | CH <sub>3</sub> CN/H <sub>2</sub> O    | 40                     |
| 15              | AgNO <sub>3</sub> (15)                 | K <sub>2</sub> S <sub>2</sub> O <sub>8</sub> (2)   | CH <sub>3</sub> CN/H <sub>2</sub> O    | 79                     |
| 16 <sup>c</sup> | AgNO <sub>3</sub> (15)                 | TBHP (2)                                           | CH <sub>3</sub> CN/H <sub>2</sub> O    | N.D.                   |
| 17              | AgNO <sub>3</sub> (15)                 | DTBP (2)                                           | CH <sub>3</sub> CN/H <sub>2</sub> O    | N.D.                   |
| 18              | AgNO <sub>3</sub> (15)                 | Oxone (2)                                          | CH <sub>3</sub> CN/H <sub>2</sub> O    | N.D.                   |
| 19              | AgNO <sub>3</sub> (15)                 | O <sub>2</sub> (1 atm)                             | CH <sub>3</sub> CN/H <sub>2</sub> O    | N.D.                   |
| 20              | AgNO <sub>3</sub> (15)                 | --                                                 | CH <sub>3</sub> CN/H <sub>2</sub> O    | N.D.                   |
| 21              | -                                      | K <sub>2</sub> S <sub>2</sub> O <sub>8</sub> (2)   | CH <sub>3</sub> CN/H <sub>2</sub> O    | N.D.                   |
| 22              | <b>AgNO<sub>3</sub> (15)</b>           | <b>K<sub>2</sub>S<sub>2</sub>O<sub>8</sub> (3)</b> | <b>CH<sub>3</sub>CN/H<sub>2</sub>O</b> | <b>82</b>              |
| 23              | AgNO <sub>3</sub> (15)                 | K <sub>2</sub> S <sub>2</sub> O <sub>8</sub> (4)   | CH <sub>3</sub> CN/H <sub>2</sub> O    | 80                     |
| 24              | AgNO <sub>3</sub> (15)                 | K <sub>2</sub> S <sub>2</sub> O <sub>8</sub> (3)   | DCE/H <sub>2</sub> O                   | 66                     |
| 25              | AgNO <sub>3</sub> (15)                 | K <sub>2</sub> S <sub>2</sub> O <sub>8</sub> (3)   | DMF/H <sub>2</sub> O                   | 35                     |
| 26              | AgNO <sub>3</sub> (15)                 | K <sub>2</sub> S <sub>2</sub> O <sub>8</sub> (3)   | DMSO/H <sub>2</sub> O                  | 56                     |
| 27              | AgNO <sub>3</sub> (15)                 | K <sub>2</sub> S <sub>2</sub> O <sub>8</sub> (3)   | EtOH/H <sub>2</sub> O                  | 71                     |

<sup>a</sup>Reaction conditions: **1a** (0.5 mmol), **2a** (1 mmol), catalyst (0-20 mol%), oxidant, mixed solvent (5 mL), N<sub>2</sub> atmosphere, 80 °C, 8 h. TBHP = *tert*-butyl hydroperoxide, DTBP = Di-*tert*-butyl peroxide. <sup>b</sup>Isolated yields were given. <sup>c</sup>CuI, CuBr, CuCl, and CuSO<sub>4</sub> were tested, respectively. <sup>d</sup>70 wt% aqueous solution was applied.

### 3. Experimental procedures

#### General Procedure for Synthesis of Benzo[4,5]imidazo[2,1-*a*]isoquinolin-6(5*H*)-ones (**3**)

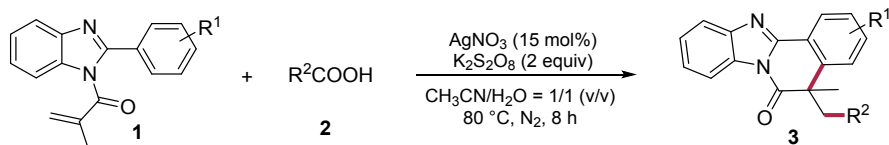

*N*-methacryloyl-2-aryl-benzimidazole **1** (0.5 mmol), carboxylic acid **2** (1 mmol), K<sub>2</sub>S<sub>2</sub>O<sub>8</sub> (3 equiv) and AgNO<sub>3</sub> (15 mol%) in CH<sub>3</sub>CN/H<sub>2</sub>O (v/v = 1/1) (5 mL) stirred at 80 °C under N<sub>2</sub> for 8 h. The solvent was evaporated under vacuum, and the residue was quenched with water (10 mL), extracted with ethyl acetate (3 × 10 mL). The combined organic layers were washed with brine (25 mL) and dried over anhydrous Na<sub>2</sub>SO<sub>4</sub>. After filtration, the solvent was evaporated in vacuo. The crude product was purified

by silica gel chromatography (petroleum ether: ethyl acetate = 10:1) to give the desired products.

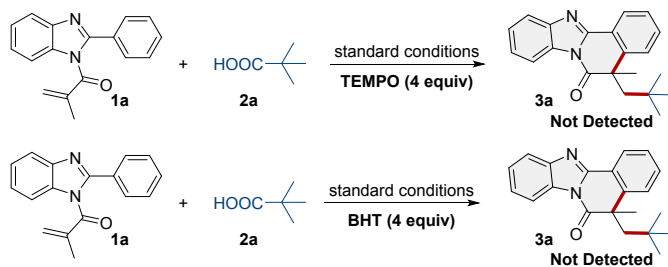

**Scheme S1.** Control experiments

We carried out a reaction starting from *N*-methacryloyl-2-phenylimidazole (**1y**) and pivalic acid under optimized reaction conditions, as illustrated in Scheme S2a. However, we only get 23% yield of the corresponding product (**3y**), a much low yield compared with that of **3a** when compound **1a** was employed as the reactant (Scheme S2b below). For further understanding this seemingly abnormal result, we then utilized computational methods to calculate the most stable conformations of *N*-methacryloyl-2-phenylimidazole (**1y**) and **1a** as well as their corresponding radical intermediates **1y'** and **1a'**, as shown below in Scheme S3 (the most stable geometries of **1y**, **1a** and **1y'**, **1a'** were obtained by B3LYP/DZVP). As it can be seen from Scheme S3, the most stable conformation of **1y'** renders a longer distance between radical

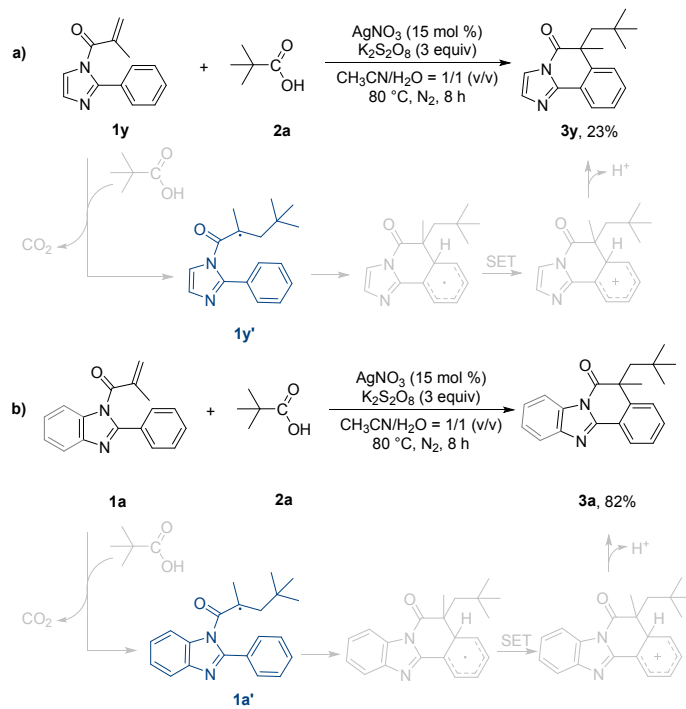

**Scheme S2**

carbon and phenyl ortho carbon, two reaction sites of further cyclization reaction, in comparison with the relatively short distance in **1a'** which should be resulted from the repulsion from the nearby  $\alpha$ -H. Thus, it is reasonably believed that reactant *N*-methacryloyl-2-phenylimidazole (**1y**) would own less chance to fulfill the cyclization process to access the final product **3y**, compared to the use of **1a** to access the corresponding product **3a**. The conformational analysis of **1a**, **1y** and **1a'**, **1y'** shown in Scheme 3 might provide an insight to the reason why a much low yield of **3y** was obtained.

**How the reaction efficiency being influenced by the conformations of the reactants**  
(Optimized geometries of compounds **1a**, **1y** and radicals **1a'**, **1y'** obtained by B3LYP/DZVP)

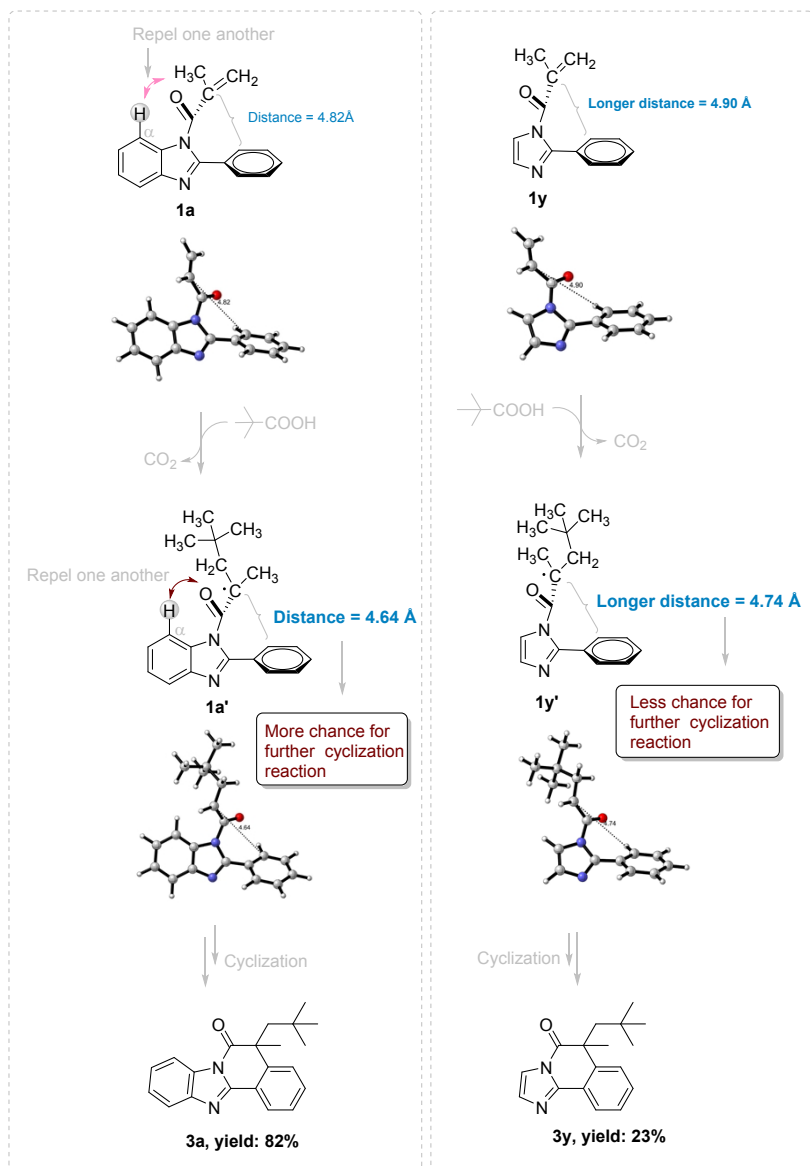

Scheme S3

## 4. Characterization Data for Products

### 5-methyl-5-neopentylbenzo[4,5]imidazo[2,1-a]isoquinolin-6(5H)-one (3a)

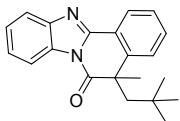

White solid,  $^1\text{H}$  NMR (400 MHz,  $\text{CDCl}_3$ )  $\delta$  8.49 (d,  $J = 7.6$  Hz, 1H), 8.40-8.38 (m, 1H), 7.85-7.83 (m, 1H), 7.56-7.40 (m, 5H), 2.63 (d,  $J = 14.4$  Hz, 1H), 2.17 (d,  $J = 14.4$  Hz, 1H), 1.71 (s, 3H), 0.54 (s, 9H).  $^{13}\text{C}$  NMR (101 MHz,  $\text{CDCl}_3$ )  $\delta$  173.5, 149.8, 144.1, 142.0, 131.4, 131.2, 127.6, 127.6, 125.9, 125.5, 122.4, 119.7, 115.8, 55.3, 47.6, 33.1, 32.0, 30.8. HRMS Calcd for  $\text{C}_{21}\text{H}_{23}\text{N}_2\text{O}$   $[\text{M} + \text{H}]^+$ :  $m/z$  319.1805, Found: 319.1811

### 5-(2,2-dimethylbutyl)-5-methylbenzo[4,5]imidazo[2,1-a]isoquinolin-6(5H)-one (3b)

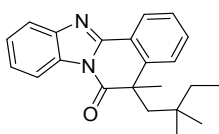

White solid,  $^1\text{H}$  NMR (400 MHz,  $\text{CDCl}_3$ )  $\delta$  8.49 (d,  $J = 7.6$  Hz, 1H), 8.40-8.38 (m, 1H), 7.84-7.82 (m, 1H), 7.55-7.50 (m, 2H), 7.48-7.40 (m, 3H), 2.61 (d,  $J = 14.4$  Hz, 1H), 2.16 (d,  $J = 14.4$  Hz, 1H), 1.71 (s, 3H), 1.00-0.86 (m, 2H), 0.68 (t,  $J = 7.6$  Hz, 3H), 0.48 (s, 3H), 0.36 (s, 3H).  $^{13}\text{C}$  NMR (101 MHz,  $\text{CDCl}_3$ )  $\delta$  173.5, 149.8, 144.1, 142.1, 131.5, 131.1, 127.6, 127.5, 125.9, 125.8, 125.5, 122.4, 119.7, 115.8, 53.1, 47.5, 36.6, 34.4, 33.2, 27.6, 26.9, 8.3. HRMS Calcd for  $\text{C}_{22}\text{H}_{25}\text{N}_2\text{O}$   $[\text{M} + \text{H}]^+$ :  $m/z$  333.1961, Found: 333.1965

### 5-(3-hydroxy-2,2-dimethylpropyl)-5-methylbenzo[4,5]imidazo[2,1-a]isoquinolin-6(5H)-one (3c)

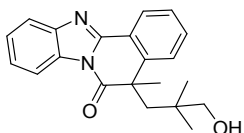

White solid,  $^1\text{H}$  NMR (400 MHz,  $\text{CDCl}_3$ )  $\delta$  8.48 (d,  $J = 8.0$  Hz, 1H), 8.39-8.37 (m, 1H), 7.83-7.81 (m, 1H), 7.57-7.53 (m, 2H), 7.50-7.41 (m, 3H), 2.94-2.84 (m, 2H), 2.69 (d,  $J = 14.8$  Hz, 1H), 2.25 (d,  $J = 14.8$  Hz, 1H), 1.96 (s, 1H), 1.71 (s, 3H), 0.60 (s, 3H), 0.42 (s, 3H).  $^{13}\text{C}$  NMR (101 MHz,  $\text{CDCl}_3$ )  $\delta$  174.0, 149.7, 144.0, 141.9, 131.3, 127.7, 127.2, 126.0, 125.9, 125.6, 122.1, 119.7, 115.8, 71.1, 48.5, 47.4, 36.6, 33.7, 26.3, 24.8. HRMS Calcd for  $\text{C}_{21}\text{H}_{23}\text{N}_2\text{O}_2$   $[\text{M} + \text{H}]^+$ :  $m/z$  335.1754, Found: 335.1753

### 5-(adamantan-1-ylmethyl)-5-methylbenzo[4,5]imidazo[2,1-a]isoquinolin-6(5H)-one (3d)

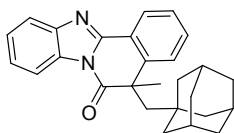

White solid,  $^1\text{H}$  NMR (400 MHz,  $\text{CDCl}_3$ )  $\delta$  8.49 (d,  $J = 7.6$  Hz, 1H), 8.41-8.39 (m, 1H), 7.85-7.83 (m, 1H), 7.52-7.49 (m, 2H), 7.48-7.40 (m, 3H), 2.50 (d,  $J = 14.4$  Hz, 1H), 2.06 (d,  $J = 14.4$  Hz, 1H), 1.66 (s, 3H), 1.63-1.61 (m, 3H), 1.42 (d,  $J = 12.0$  Hz, 3H), 1.28 (d,  $J = 11.6$  Hz, 3H), 1.15-1.07 (m, 6H).  $^{13}\text{C}$  NMR (101 MHz,  $\text{CDCl}_3$ )  $\delta$  173.4, 149.8, 144.1, 142.3, 131.5, 131.1, 127.6, 125.8, 125.8, 125.5, 122.1, 119.7, 115.9, 56.2, 46.8, 43.5, 36.4, 34.2, 33.7, 28.4. HRMS Calcd for  $\text{C}_{27}\text{H}_{29}\text{N}_2\text{O}$   $[\text{M} + \text{H}]^+$ :  $m/z$  397.2274, Found: 397.2277

*5-(3-hydroxyadamantan-1-yl)methyl)-5-methylbenzo[4,5]imidazo[2,1-a]isoquinolin-6(5H)-one (3e)*

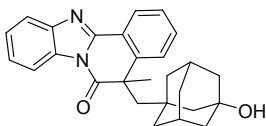

White solid,  $^1\text{H}$  NMR (400 MHz,  $\text{CDCl}_3$ )  $\delta$  8.49 (d,  $J = 7.6$  Hz, 1H), 8.39 (d,  $J = 7.2$  Hz, 1H), 7.85-7.83 (m, 1H), 7.55-7.41 (m, 5H), 2.60 (d,  $J = 14.4$  Hz, 1H), 2.14 (d,  $J = 14.4$  Hz, 1H), 1.86 (d,  $J = 16.0$  Hz, 2H), 1.67 (s, 3H), 1.45-1.25 (m, 5H), 1.17-0.87 (m, 7H).  $^{13}\text{C}$  NMR (101 MHz,  $\text{CDCl}_3$ )  $\delta$  173.2, 149.6, 144.1, 141.9, 131.4, 131.2, 127.8, 127.4, 126.0, 125.9, 125.6, 122.1, 119.8, 115.8, 68.3, 54.8, 51.6, 46.9, 44.1, 44.0, 41.9, 41.6, 37.7, 34.8, 33.7, 30.4, 30.4. HRMS Calcd for  $\text{C}_{27}\text{H}_{29}\text{N}_2\text{O}_2$   $[\text{M} + \text{H}]^+$ :  $m/z$  413.2224, Found: 413.2230

*5-methyl-5-(4-oxoadamantan-1-yl)methyl)benzo[4,5]imidazo[2,1-a]isoquinolin-6(5H)-one (3f)*

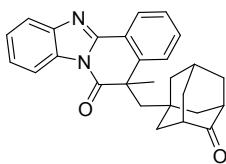

White solid,  $^1\text{H}$  NMR (400 MHz,  $\text{CDCl}_3$ )  $\delta$  8.53-8.51 (m, 1H), 8.40-8.38 (m, 1H), 7.87-7.85 (m, 1H), 7.58-7.43 (m, 5H), 2.65 (d,  $J = 14.8$  Hz, 1H), 2.26 (d,  $J = 14.8$  Hz, 2H), 2.16 (d,  $J = 14.8$  Hz, 1H), 1.81-1.75 (m, 2H), 1.72-1.70 (m, 2H), 1.69 (s, 3H), 1.63-1.55 (m, 2H), 1.51-1.39 (m, 3H), 1.36-1.25 (m, 2H).  $^{13}\text{C}$  NMR (101 MHz,  $\text{CDCl}_3$ )  $\delta$  217.3, 173.0, 149.4, 144.1, 141.4, 131.3, 128.0, 127.3, 126.2, 126.1, 125.7, 122.1, 119.9, 115.8, 53.6, 46.9, 46.3, 46.1, 44.9, 44.2, 41.7, 38.2, 38.2, 34.0, 33.8, 27.5. HRMS Calcd for  $\text{C}_{27}\text{H}_{27}\text{N}_2\text{O}_2$   $[\text{M} + \text{H}]^+$ :  $m/z$  411.2067, Found: 411.2071

*5-isobutyl-5-methylbenzo[4,5]imidazo[2,1-a]isoquinolin-6(5H)-one (3g)*

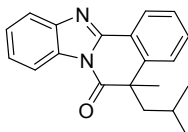

Yellow oil,  $^1\text{H}$  NMR (400 MHz,  $\text{CDCl}_3$ )  $\delta$  8.50 (d,  $J = 7.6$ , 1H), 8.40-8.38 (m, 1H), 7.84-7.82 (m, 1H), 7.54 (td,  $J = 7.6$ , 1.6 Hz, 1H), 7.47-7.38 (m, 4H), 2.45 (dd,  $J = 14.4$ , 8.4 Hz, 1H), 2.07 (dd,  $J = 14.4$ , 5.2 Hz, 1H), 1.68 (s, 3H), 1.33-1.25 (m, 1H), 0.61 (d,  $J = 6.8$  Hz, 3H), 0.56 (d,  $J = 6.8$  Hz, 3H).  $^{13}\text{C}$  NMR (101 MHz,  $\text{CDCl}_3$ )  $\delta$  173.5, 149.8, 144.1, 141.8, 131.6, 131.4, 127.6, 126.6, 125.9, 125.8, 125.5, 122.7, 119.8, 115.8, 50.5, 48.5, 31.4, 25.6, 23.9, 22.4. HRMS Calcd for  $\text{C}_{20}\text{H}_{21}\text{N}_2\text{O}$   $[\text{M} + \text{H}]^+$ :  $m/z$  305.1648, Found: 305.1651

*5-(2-ethylbutyl)-5-methylbenzo[4,5]imidazo[2,1-a]isoquinolin-6(5H)-one (3h)*

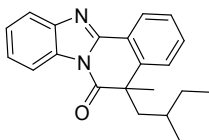

Yellow oil,  $^1\text{H}$  NMR (400 MHz,  $\text{CDCl}_3$ )  $\delta$  8.50-8.48 (m, 1H), 8.38-8.36 (m, 1H), 7.83-7.81 (m, 1H), 7.54-7.50 (m, 1H), 7.45-7.39 (m, 4H), 2.39 (dd,  $J = 14.0$ , 6.4 Hz, 1H), 1.98 (dd,  $J = 14.4$ , 4.0 Hz, 1H), 1.72 (s, 3H), 0.97-0.84 (m, 5H), 0.54 (q,  $J = 7.6$  Hz, 6H).  $^{13}\text{C}$  NMR (101 MHz,  $\text{CDCl}_3$ )  $\delta$  173.4, 149.8, 144.1, 141.8, 131.4 (d,  $J = 13.8$  Hz), 127.5, 126.6, 125.8, 125.7, 125.4, 122.9, 119.7, 115.6, 48.6, 46.4, 37.3, 29.8, 25.8,

25.2, 10.3, 10.0. HRMS Calcd for C<sub>22</sub>H<sub>25</sub>N<sub>2</sub>O [M + H]<sup>+</sup>: m/z 333.1961, Found: 333.1966

*5-(cyclopropylmethyl)-5-methylbenzo[4,5]imidazo[2,1-a]isoquinolin-6(5H)-one (3i)*

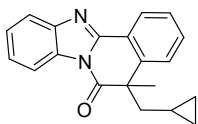

White solid, <sup>1</sup>H NMR (400 MHz, CDCl<sub>3</sub>) δ 8.48 (d, *J* = 8.0, 1H), 8.38-8.36 (m, 1H), 7.83-7.81 (m, 1H), 7.59-7.55 (m, 1H), 7.50-7.40 (m, 4H), 2.18 (dd, *J* = 13.6, 5.2 Hz, 1H), 2.00 (dd, *J* = 13.6, 8.4 Hz, 1H), 1.77 (s, 3H), 0.17-0.06 (m, 2H), -0.04-0.10 (m, 2H), -0.20-0.24 (m, 1H). <sup>13</sup>C NMR (101 MHz, CDCl<sub>3</sub>) δ 173.6, 150.1, 144.0, 142.0, 131.7, 131.4, 127.6, 126.3, 125.8, 125.7, 125.5, 123.3, 119.7, 115.6, 49.7, 49.5, 26.9, 6.9, 3.9, 3.7. HRMS Calcd for C<sub>20</sub>H<sub>19</sub>N<sub>2</sub>O [M + H]<sup>+</sup>: m/z 303.1492, Found: 303.1492

*5-(cyclobutylmethyl)-5-methylbenzo[4,5]imidazo[2,1-a]isoquinolin-6(5H)-one (3j)*

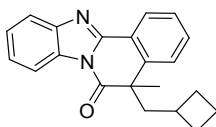

White solid, <sup>1</sup>H NMR (400 MHz, CDCl<sub>3</sub>) δ 8.48-8.45 (m, 1H), 8.37-8.35 (m, 1H), 7.83-7.81 (m, 1H), 7.57-7.53 (m, 1H), 7.48-7.39 (m, 4H), 2.47 (dd, *J* = 13.6, 8.0 Hz, 1H), 2.07 (dd, *J* = 13.6, 8.0 Hz, 1H), 1.89-1.80 (m, 1H), 1.74 (s, 3H), 1.52-1.38 (m, 5H), 1.34-1.25 (m, 1H). <sup>13</sup>C NMR (101 MHz, CDCl<sub>3</sub>) δ 173.3, 149.9, 144.0, 141.8, 131.6, 131.4, 127.6, 126.5, 125.8, 125.7, 125.5, 122.9, 119.7, 115.7, 51.3, 48.6, 32.9, 28.9, 28.5, 27.9, 18.6. HRMS Calcd for C<sub>21</sub>H<sub>21</sub>N<sub>2</sub>O [M + H]<sup>+</sup>: m/z 317.1648, Found: 317.1654

*5-(cyclopentylmethyl)-5-methylbenzo[4,5]imidazo[2,1-a]isoquinolin-6(5H)-one (3k)*

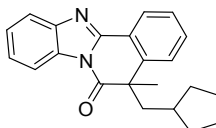

White solid, <sup>1</sup>H NMR (400 MHz, CDCl<sub>3</sub>) δ 8.49-8.47 (m, 1H), 8.40-8.37 (m, 1H), 7.84-7.82 (m, 1H), 7.59-7.55 (m, 1H), 7.50-7.41 (m, 4H), 2.53 (dd, *J* = 13.6, 7.6 Hz, 1H), 2.19 (dd, *J* = 13.6, 7.2 Hz, 1H), 1.73 (s, 3H), 1.39-1.15 (m, 7H), 0.96-0.94 (m, 1H), 0.81-0.78 (m, 1H). <sup>13</sup>C NMR (101 MHz, CDCl<sub>3</sub>) δ 173.6, 149.9, 144.1, 142.1, 131.6, 131.4, 127.6, 126.6, 125.9, 125.8, 125.5, 122.8, 119.7, 115.8, 49.1, 49.1, 37.5, 33.6, 32.4, 30.1, 24.9, 24.6. HRMS Calcd for C<sub>22</sub>H<sub>23</sub>N<sub>2</sub>O [M + H]<sup>+</sup>: m/z 331.1805, Found: 331.1805

*5-(cyclohexylmethyl)-5-methylbenzo[4,5]imidazo[2,1-a]isoquinolin-6(5H)-one (3l)*

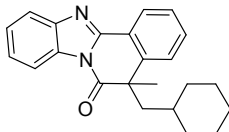

White solid, <sup>1</sup>H NMR (400 MHz, CDCl<sub>3</sub>) δ 8.49 (d, *J* = 8.0, 1H), 8.39-8.37 (m, 1H), 7.84-7.82 (m, 1H), 7.58-7.54 (m, 1H), 7.49-7.40 (m, 4H), 2.48 (dd, *J* = 14.4, 8.0 Hz, 1H), 2.06 (dd, *J* = 14.4, 4.8 Hz, 1H), 1.66 (s, 3H), 1.46-1.36 (m, 3H), 1.27-1.16 (m, 2H), 1.00-0.75 (m, 6H). <sup>13</sup>C NMR (101 MHz, CDCl<sub>3</sub>) δ 173.5, 149.8,



144.1, 141.9, 131.6, 131.5, 127.6, 126.6, 125.9, 125.8, 125.5, 122.6, 119.7, 115.8, 48.8, 48.3, 34.9, 34.2, 32.9, 31.8, 26.0, 25.9. HRMS Calcd for C<sub>23</sub>H<sub>25</sub>N<sub>2</sub>O [M + H]<sup>+</sup>: m/z 345.1961, Found: 345.1959

**5-methyl-5-propylbenzo[4,5]imidazo[2,1-a]isoquinolin-6(5H)-one (3m)**

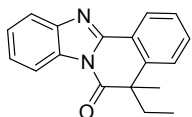

White oil, <sup>1</sup>H NMR (400 MHz, CDCl<sub>3</sub>) δ 8.48 (d, *J* = 8.0 Hz, 1H), 8.38-8.36 (m, 1H), 7.83-7.80 (m, 1H), 7.54 (m, 1H), 7.48-7.40 (m, 4H), 2.47-2.38 (m, 1H), 2.04-1.95 (m, 1H), 1.72 (s, 3H), 0.57 (t, *J* = 7.6 Hz, 3H). <sup>13</sup>C NMR (101 MHz, CDCl<sub>3</sub>) δ 173.3, 149.9, 144.1, 141.5, 131.8, 131.3, 127.6, 126.1, 125.8, 125.8, 125.5, 123.2, 119.8, 115.7, 50.0, 36.4, 29.7, 28.3, 9.6. HRMS Calcd for C<sub>18</sub>H<sub>17</sub>N<sub>2</sub>O [M + H]<sup>+</sup>: m/z 277.1335, Found: 277.1341

**5-methyl-5-propylbenzo[4,5]imidazo[2,1-a]isoquinolin-6(5H)-one (3n)**

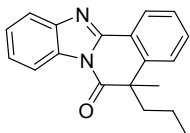

White oil, <sup>1</sup>H NMR (400 MHz, CDCl<sub>3</sub>) δ 8.49-8.46 (m, 1H), 8.38-8.35 (m, 1H), 7.83-7.80 (m, 1H), 7.58-7.54 (m, 1H), 7.48-7.39 (m, 4H), 2.41-2.33 (m, 1H), 1.98-1.90 (m, 1H), 1.73 (s, 3H), 1.00-0.78 (m, 2H), 0.74 (t, *J* = 7.2 Hz, 3H). <sup>13</sup>C NMR (101 MHz, CDCl<sub>3</sub>) δ 173.4, 149.9, 144.1, 141.9, 131.8, 131.3, 127.6, 126.0, 125.8, 125.8, 125.5, 123.0, 119.8, 115.7, 49.5, 45.5, 28.6, 18.5, 14.0. HRMS Calcd for C<sub>19</sub>H<sub>19</sub>N<sub>2</sub>O [M + H]<sup>+</sup>: m/z 291.1492, Found: 291.1497

**5-methyl-5-(2-phenoxyethyl)benzo[4,5]imidazo[2,1-a]isoquinolin-6(5H)-one (3o)**

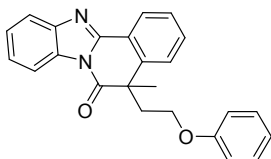

White solid, <sup>1</sup>H NMR (400 MHz, CDCl<sub>3</sub>) δ 8.45-8.40 (m, 2H), 7.80-7.76 (m, 1H), 7.55 (t, *J* = 7.2 Hz, 1H), 7.48-7.42 (m, 4H), 6.91 (t, *J* = 7.6 Hz, 2H), 6.70 (t, *J* = 7.2 Hz, 1H), 6.12 (d, *J* = 8.4 Hz, 2H), 3.82-3.77 (m, 1H), 3.45-3.39 (m, 1H), 3.17-3.10 (m, 1H), 2.40-2.35 (m, 1H), 1.80 (s, 3H). <sup>13</sup>C NMR (101 MHz, CDCl<sub>3</sub>) δ 173.0, 157.6, 149.6, 144.0, 140.4, 131.7, 131.6, 129.1, 127.9, 126.2, 126.1, 125.8, 125.6, 123.2, 120.7, 119.8, 115.7, 113.6, 63.7, 47.0, 41.6, 29.7. HRMS Calcd for C<sub>24</sub>H<sub>21</sub>N<sub>2</sub>O<sub>2</sub> [M + H]<sup>+</sup>: m/z 369.1598, Found: 369.1596

**3,5-dimethyl-5-neopentylbenzo[4,5]imidazo[2,1-a]isoquinolin-6(5H)-one (3p)**

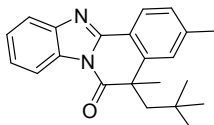

White solid, <sup>1</sup>H NMR (400 MHz, CDCl<sub>3</sub>) δ 8.38-8.36 (m, 2H), 7.81 (d, *J* = 7.2 Hz, 1H), 7.43-7.36 (m, 2H), 7.29-7.25 (m, 2H), 2.61 (d, *J* = 14.4 Hz, 1H), 2.43 (s, 3H), 2.14 (d, *J* = 14.4 Hz, 1H), 1.69 (s, 3H), 0.54 (s, 9H). <sup>13</sup>C NMR (101 MHz, CDCl<sub>3</sub>) δ 173.5, 150.0, 144.2, 141.9, 141.6, 131.4, 128.7, 128.0, 125.8, 125.7, 125.2,

119.8, 119.5, 115.7, 55.2, 47.5, 33.0, 32.0, 30.8, 21.9. HRMS Calcd for C<sub>22</sub>H<sub>25</sub>N<sub>2</sub>O [M + H]<sup>+</sup>: m/z 333.1961, Found: 333.1959

*3-methoxy-5-methyl-5-neopentylbenzo[4,5]imidazo[2,1-a]isoquinolin-6(5H)-one (3q)*

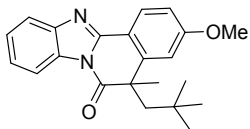

White solid, <sup>1</sup>H NMR (400 MHz, CDCl<sub>3</sub>) δ 8.40 (d, *J* = 8.8 Hz, 1H), 8.33 (d, *J* = 8.0 Hz, 1H), 7.75 (d, *J* = 7.6 Hz, 1H), 7.39-7.31 (m, 2H), 7.00-6.95 (m, 2H), 3.84 (d, *J* = 2.8 Hz, 3H), 2.59 (d, *J* = 14.4 Hz, 1H), 2.09 (d, *J* = 14.4 Hz, 1H), 1.66 (s, 3H), 0.54 (s, 9H). <sup>13</sup>C NMR (101 MHz, CDCl<sub>3</sub>) δ 173.3, 162.0, 149.9, 144.2, 144.0, 131.3, 127.8, 125.7, 125.0, 119.3, 115.6, 115.4, 113.6, 113.1, 55.5, 55.4, 47.7, 33.1, 32.0, 30.8. HRMS Calcd for C<sub>22</sub>H<sub>25</sub>N<sub>2</sub>O<sub>2</sub> [M + H]<sup>+</sup>: m/z 349.1911, Found: 349.1911

*3-chloro-5-methyl-5-neopentylbenzo[4,5]imidazo[2,1-a]isoquinolin-6(5H)-one (3r)*

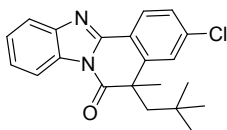

White solid, <sup>1</sup>H NMR (400 MHz, CDCl<sub>3</sub>) δ 8.42 (d, *J* = 8.4 Hz, 1H), 8.38-8.36 (m, 1H), 7.83-7.81 (m, 1H), 7.49-7.41 (m, 4H), 2.64 (d, *J* = 14.4 Hz, 1H), 2.12 (d, *J* = 14.4 Hz, 1H), 1.71 (s, 3H), 0.56 (s, 9H). <sup>13</sup>C NMR (101 MHz, CDCl<sub>3</sub>) δ 172.7, 148.8, 144.0, 143.7, 137.5, 131.3, 128.2, 127.7, 127.3, 126.1, 125.8, 121.0, 119.8, 115.8, 55.3, 47.7, 33.0, 32.1, 30.8, 14.1. HRMS Calcd for C<sub>21</sub>H<sub>22</sub>ClN<sub>2</sub>O [M + H]<sup>+</sup>: m/z 353.1415, Found: 353.1415

*5-methyl-5-neopentyl-6-oxo-5,6-dihydrobenzo[4,5]imidazo[2,1-a]isoquinoline-3-carbonitrile (3s)*

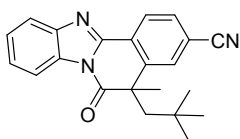

White solid, <sup>1</sup>H NMR (400 MHz, Chloroform-*d*) δ 8.60 (d, *J* = 8.0 Hz, 1H), 8.41 – 8.39 (m, 1H), 7.88 – 7.85 (m, 1H), 7.81 (s, 1H), 7.74 (dd, *J* = 8.0, 1.2 Hz, 1H), 7.52 – 7.47 (m, 2H), 2.69 (d, *J* = 14.4, 1H), 2.15 (d, *J* = 14.4 Hz, 1H), 1.73 (s, 3H), 0.55 (s, 9H). <sup>13</sup>C NMR (101 MHz, CDCl<sub>3</sub>) δ 172.0, 147.7, 144.0, 142.9, 131.7, 131.4, 130.7, 126.6, 126.6, 126.4, 126.4, 120.3, 118.1, 116.0, 114.4, 55.4, 47.7, 32.9, 32.1, 30.8. HRMS Calcd for C<sub>22</sub>H<sub>22</sub>N<sub>3</sub>O [M + H]<sup>+</sup>: m/z 344.1757, Found: 344.1760

*5-methyl-5-(2-oxo-2-phenylethyl)benzo[4,5]imidazo[2,1-a]isoquinolin-6(5H)-one (3t)*

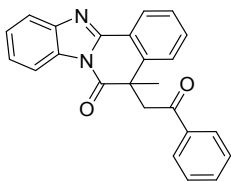

Light yellow solid, <sup>1</sup>H NMR (400 MHz, CDCl<sub>3</sub>) δ 8.65-8.47 (m, 1H), 8.34 (dd, *J* = 7.4, 1.6 Hz, 1H), 8.00-

7.76 (m, 3H), 7.52 (t,  $J = 7.4$  Hz, 1H), 7.48-7.34 (m, 6H), 7.32 (dt,  $J = 5.0, 3.1$  Hz, 1H), 4.29 (d,  $J = 18.3$  Hz, 1H), 4.14 (d,  $J = 18.2$  Hz, 1H), 1.70 (s, 3H).  $^{13}\text{C}$  NMR (101 MHz,  $\text{CDCl}_3$ )  $\delta$  196.2, 173.3, 150.1, 144.1, 142.0, 135.6, 133.7, 131.7, 131.6, 128.7, 128.1, 127.6, 126.4, 125.7, 125.4, 124.5, 123.0, 119.8, 115.7, 49.3, 46.2, 30.2. HRMS Calcd for  $\text{C}_{24}\text{H}_{19}\text{N}_2\text{O}_2$   $[\text{M} + \text{H}]^+$ :  $m/z$  367.1441, Found: 367.1443

***5-methyl-5-(2-oxopropyl)benzo[4,5]imidazo[2,1-a]isoquinolin-6(5H)-one (3u)***

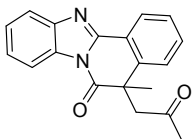

White solid,  $^1\text{H}$  NMR (400 MHz,  $\text{CDCl}_3$ )  $\delta$  8.49 (d,  $J = 7.2$ , 1H), 8.32 (d,  $J = 7.6$ , 1H), 7.83 (d,  $J = 7.6$ , 1H), 7.46-7.37 (m, 4H), 7.27 (d,  $J = 7.6$  Hz, 1H), 3.76 (d,  $J = 16.8$  Hz, 1H), 3.48 (d,  $J = 16.8$  Hz, 1H), 1.99 (s, 3H), 1.57 (s, 3H).  $^{13}\text{C}$  NMR (101 MHz,  $\text{CDCl}_3$ )  $\delta$  204.8, 173.2, 150.0, 144.0, 141.7, 131.6, 131.6, 130.0, 129.0, 127.6, 126.7, 126.3, 125.7, 125.4, 124.5, 123.0, 119.7, 115.6, 53.9, 45.9, 29.9, 29.5. HRMS Calcd for  $\text{C}_{19}\text{H}_{17}\text{N}_2\text{O}_2$   $[\text{M} + \text{H}]^+$ :  $m/z$  305.1285, Found: 305.1286

***3-chloro-5-methyl-5-(2-oxo-2-phenylethyl)benzo[4,5]imidazo[2,1-a]isoquinolin-6(5H)-one (3v)***

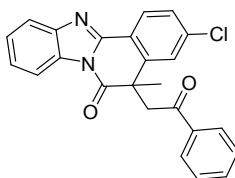

White solid,  $^1\text{H}$  NMR (400 MHz,  $\text{CDCl}_3$ )  $\delta$  8.52 (d,  $J = 8.8$  Hz, 1H), 8.36-8.34 (m, 1H), 7.90-7.85 (m, 3H), 7.55 (t,  $J = 7.2$  Hz, 1H), 7.49-7.40 (m, 5H), 7.33 (d,  $J = 1.2$  Hz, 1H), 4.35 (d,  $J = 18.0$  Hz, 1H), 4.08 (d,  $J = 18.0$  Hz, 1H), 1.73 (s, 3H).  $^{13}\text{C}$  NMR (101 MHz,  $\text{CDCl}_3$ )  $\delta$  196.0, 172.6, 149.2, 144.1, 143.8, 137.7, 135.4, 133.8, 131.6, 130.1, 128.7, 128.2, 128.1, 127.8, 125.8, 125.6, 124.8, 121.8, 119.9, 115.7, 49.4, 46.2, 30.0. HRMS Calcd for  $\text{C}_{24}\text{H}_{18}\text{ClN}_2\text{O}_2$   $[\text{M} + \text{H}]^+$ :  $m/z$  401.1051, Found: 401.1055

***5-methyl-5-(2-oxo-2-(p-tolyl)ethyl)benzo[4,5]imidazo[2,1-a]isoquinolin-6(5H)-one (3w)***

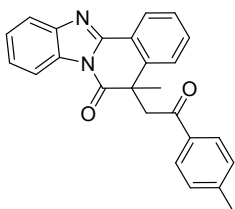

White solid,  $^1\text{H}$  NMR (400 MHz,  $\text{CDCl}_3$ )  $\delta$  8.58-8.56 (m, 1H), 8.37-8.35 (m, 1H), 7.89 (d,  $J = 7.2$  Hz, 1H), 7.77 (d,  $J = 8.0$  Hz, 2H), 7.48-7.40 (m, 4H), 7.36-7.33 (m, 1H), 7.22 (d,  $J = 8.0$  Hz, 2H), 4.30 (d,  $J = 18.0$  Hz, 1H), 4.15 (d,  $J = 18.1$  Hz, 1H), 2.40 (s, 3H), 1.74 (s, 3H).  $^{13}\text{C}$  NMR (101 MHz,  $\text{CDCl}_3$ )  $\delta$  195.6, 173.3, 150.1, 144.5, 144.0, 142.0, 133.2, 131.7, 131.6, 129.3, 128.1, 127.5, 126.4, 125.6, 125.3, 124.4, 123.0, 119.7, 115.6, 49.2, 46.2, 30.2, 21.6. HRMS Calcd for  $\text{C}_{25}\text{H}_{21}\text{N}_2\text{O}_2$   $[\text{M} + \text{H}]^+$ :  $m/z$  381.1598, Found: 381.1601

***5-(2-(4-chlorophenyl)-2-oxoethyl)-5-methylbenzo[4,5]imidazo[2,1-a]isoquinolin-6(5H)-one (3x)***

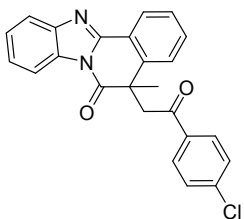

$^1\text{H}$  NMR (400 MHz,  $\text{CDCl}_3$ )  $\delta$  8.58-8.56 (m, 1H), 8.37-8.35 (m, 1H), 7.90-7.88 (m, 1H), 7.75 (d,  $J$  = 8.8 Hz, 2H), 7.48-7.40 (m, 4H), 7.36-7.28 (m, 3H), 4.26 (d,  $J$  = 18.4 Hz, 1H), 4.08 (d,  $J$  = 18.4 Hz, 1H), 1.71 (s, 3H).  $^{13}\text{C}$  NMR (101 MHz,  $\text{CDCl}_3$ )  $\delta$  195.0, 173.2, 150.1, 144.1, 141.8, 140.1, 133.9, 131.7, 129.5, 129.0, 127.6, 126.4, 125.7, 125.4, 124.4, 123.1, 119.8, 115.6, 49.2, 46.2, 30.1. HRMS Calcd for  $\text{C}_{24}\text{H}_{18}\text{ClN}_2\text{O}_2$  [ $\text{M} + \text{H}$ ] $^+$ :  $m/z$  401.1051, Found: 401.1056

**6-methyl-6-neopentylimidazo[2,1-a]isoquinolin-5(6H)-one (3y)**

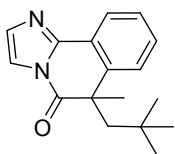

White oil,  $^1\text{H}$  NMR (400 MHz,  $\text{CDCl}_3$ )  $\delta$  8.35-8.22 (m, 2H), 7.65-7.20 (m, 4H), 2.51 (d,  $J$  = 14.4 Hz, 1H), 2.04 (d,  $J$  = 14.4 Hz, 1H), 1.59 (s, 3H), 0.60 (s, 9H).  $^{13}\text{C}$  NMR (101 MHz,  $\text{CDCl}_3$ )  $\delta$  176.6, 163.9, 145.1, 133.83, 133.82, 128.5, 127.3, 127.26, 127.25, 123.9, 53.4, 46.3, 33.4, 32.0, 30.8. HRMS Calcd for  $\text{C}_{17}\text{H}_{21}\text{N}_2\text{O}$  [ $\text{M} + \text{H}$ ] $^+$ :  $m/z$  269.1648, Found: 269.1646

**5-neopentyl-5-phenylbenzo[4,5]imidazo[2,1-a]isoquinolin-6(5H)-one (3z)**

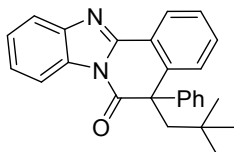

White solid,  $^1\text{H}$  NMR (400 MHz,  $\text{CDCl}_3$ )  $\delta$  8.55 (dd,  $J$  = 8.0, 1.6 Hz, 1H), 8.30-8.27 (m, 1H), 7.86-7.83 (m, 1H), 7.50-7.37 (m, 4H), 7.28 – 7.20 (m, 5H), 7.15 (dd,  $J$  = 8.0, 1.2 Hz, 1H), 3.30 (d,  $J$  = 13.6 Hz, 1H), 2.55 (d,  $J$  = 13.6 Hz, 1H), 0.63 (s, 9H).  $^{13}\text{C}$  NMR (101 MHz,  $\text{CDCl}_3$ )  $\delta$  171.4, 149.8, 145.0, 144.1, 142.0, 131.5, 131.2, 130.2, 128.8, 127.9, 127.5, 127.0, 126.0, 125.7, 125.6, 123.3, 119.7, 115.9, 55.4, 51.5, 31.9, 31.1. HRMS Calcd for  $\text{C}_{26}\text{H}_{25}\text{N}_2\text{O}$  [ $\text{M} + \text{H}$ ] $^+$ :  $m/z$  381.1961, Found: 381.1966

**5. NMR Copies of Products**

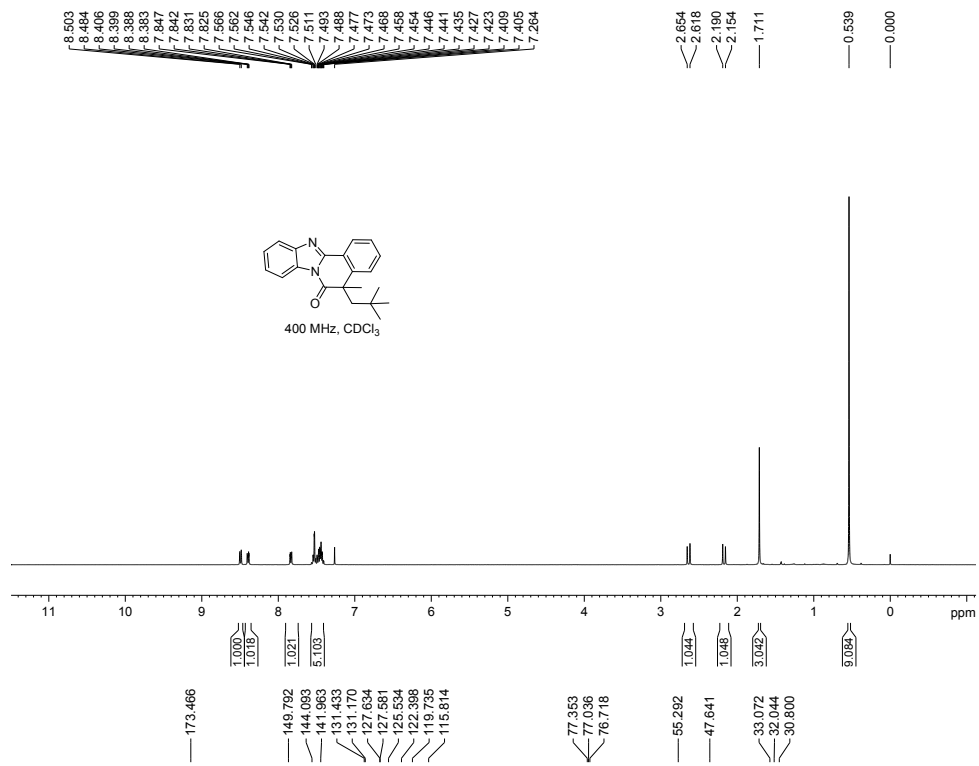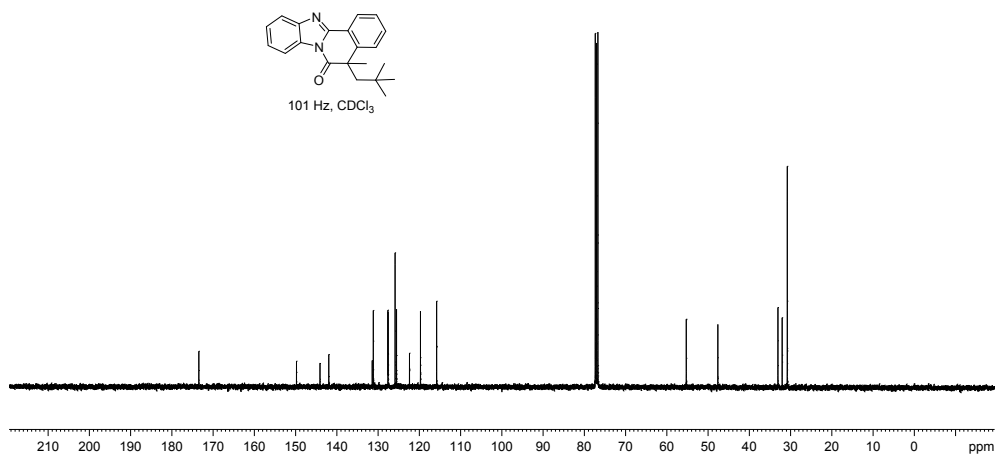

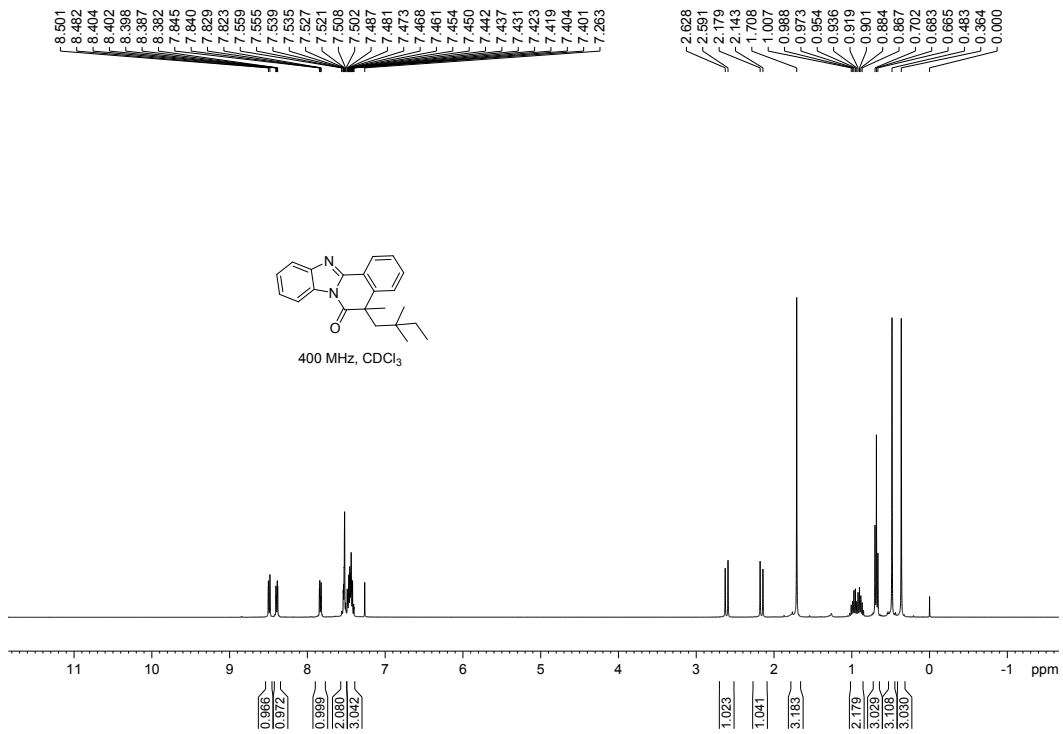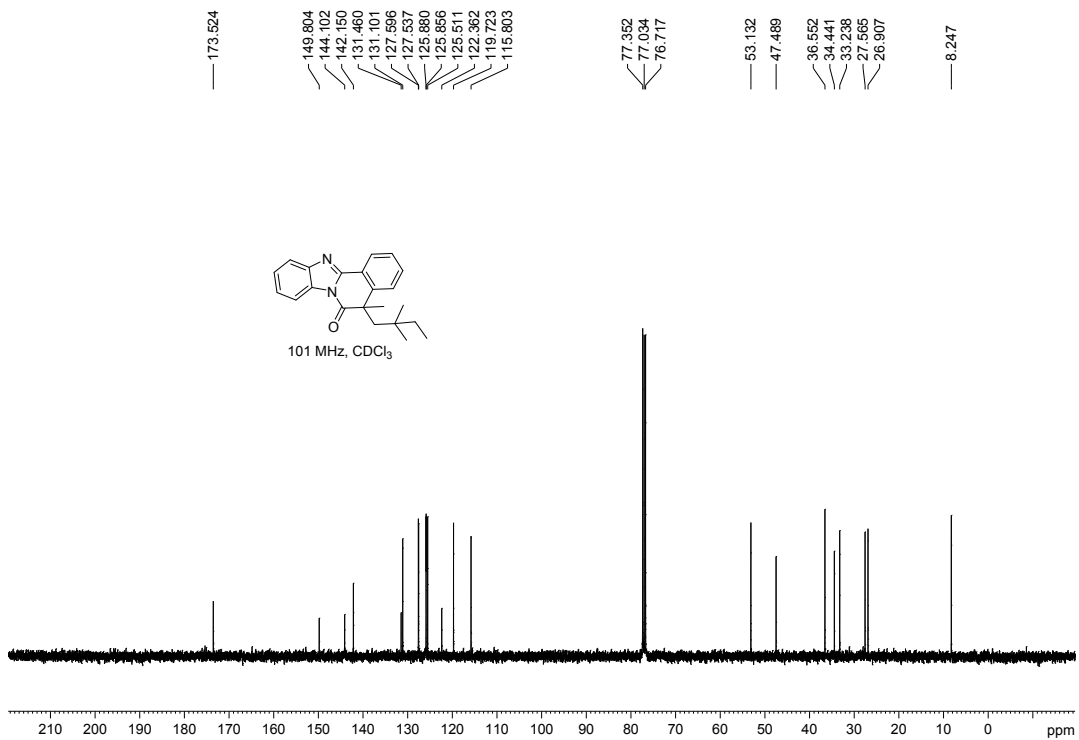

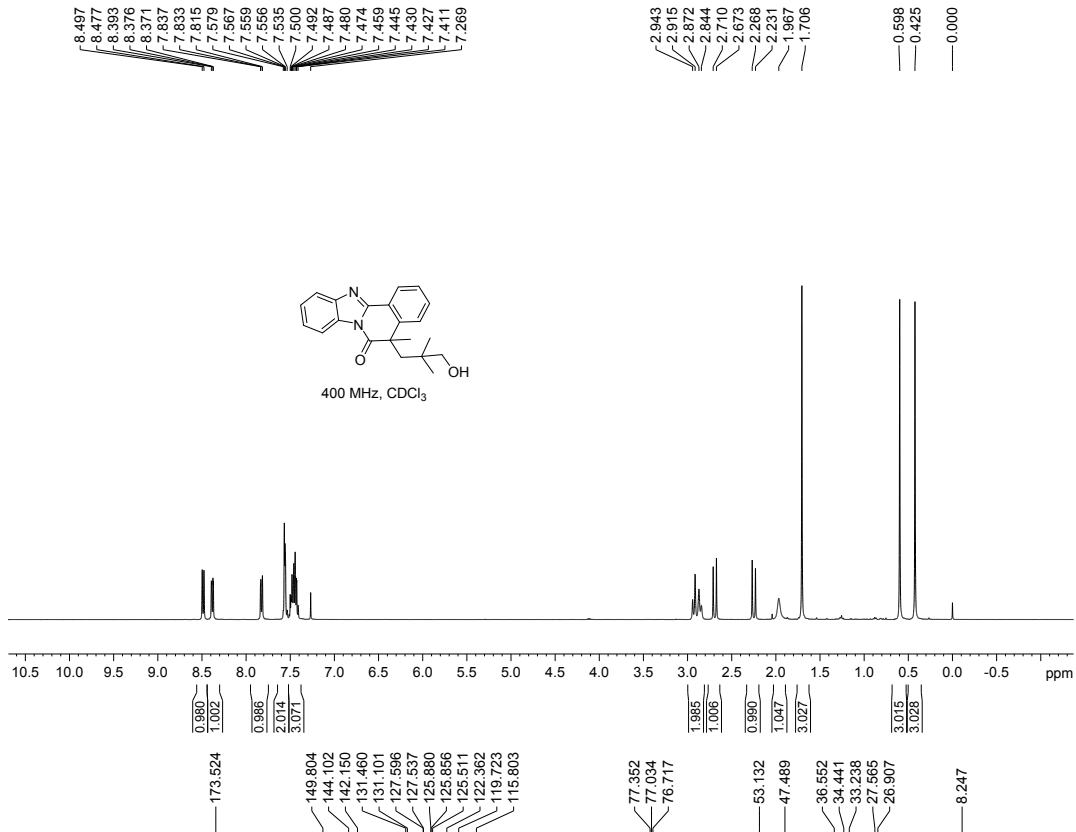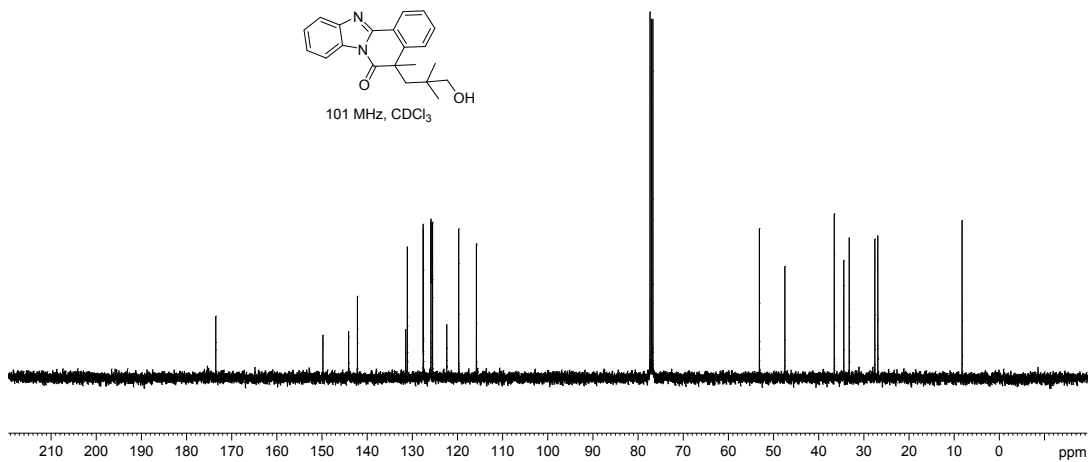

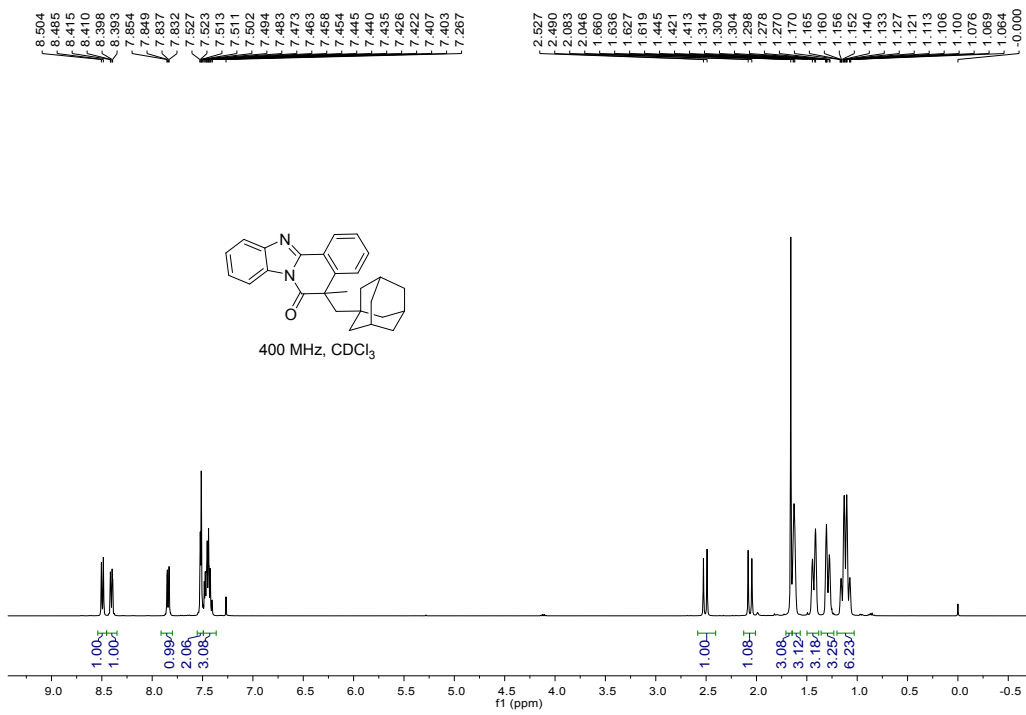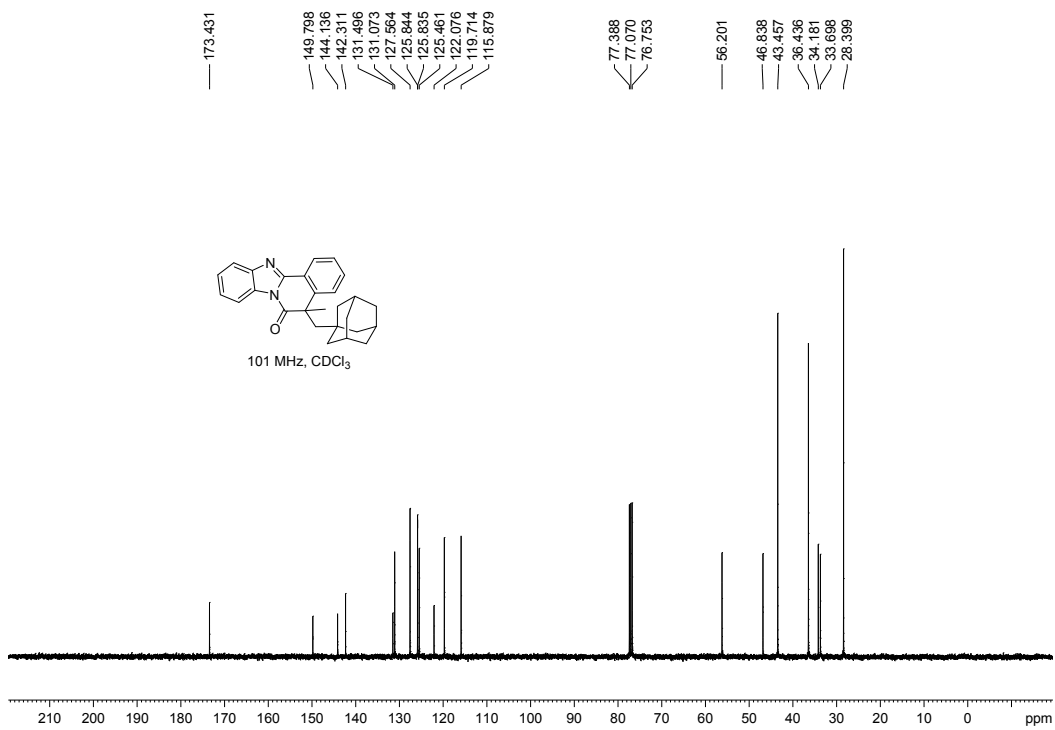



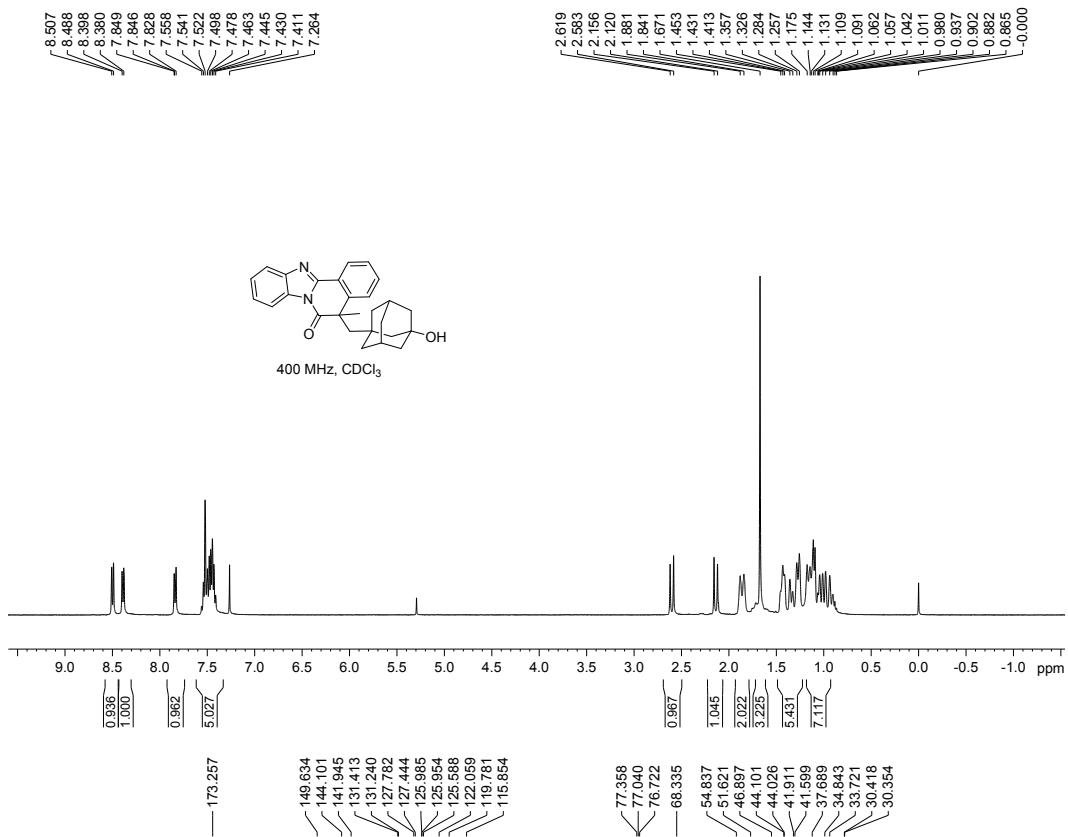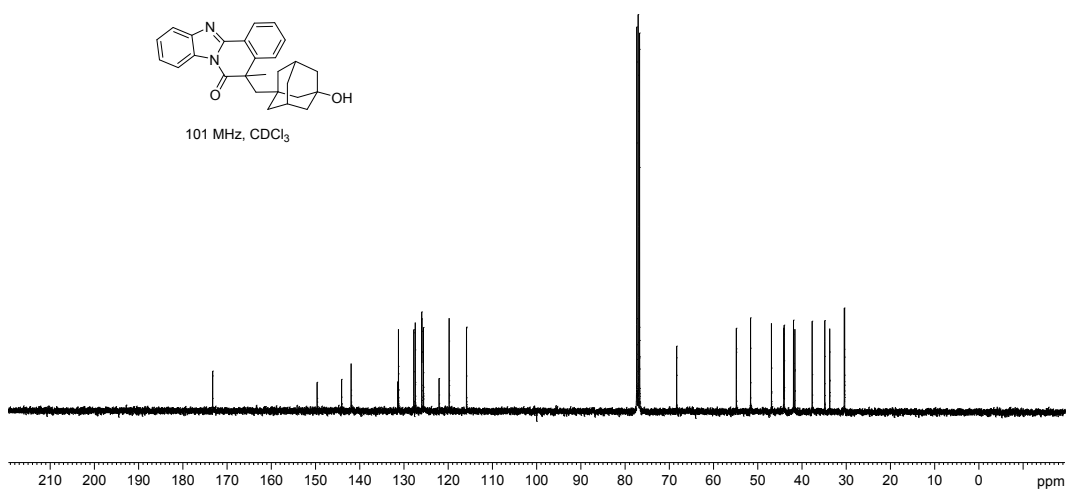

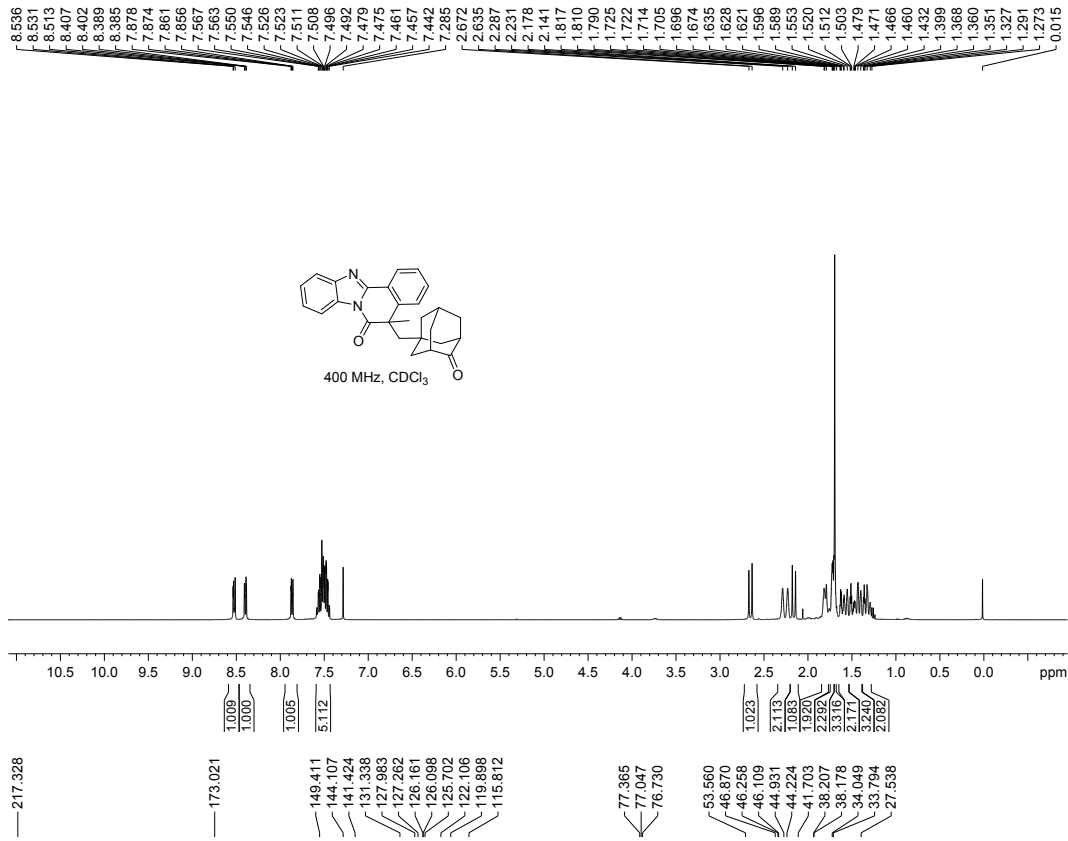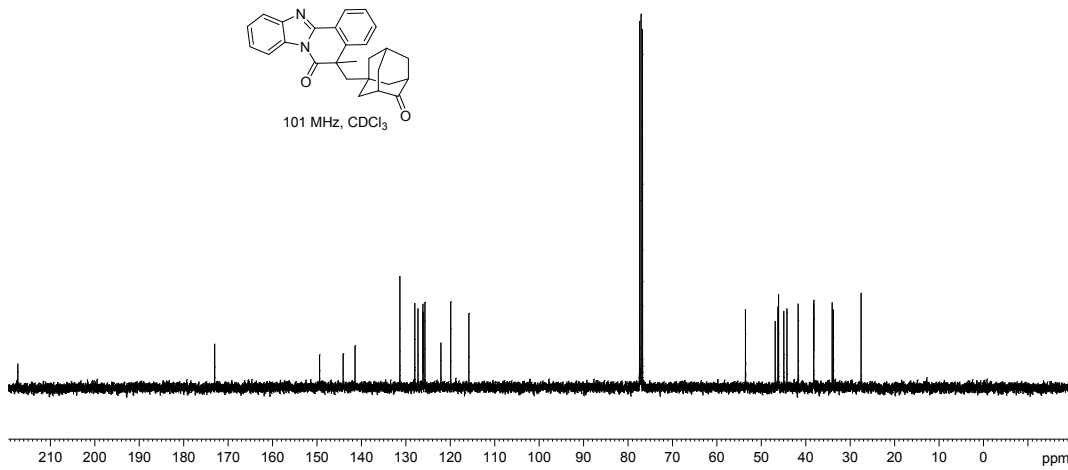

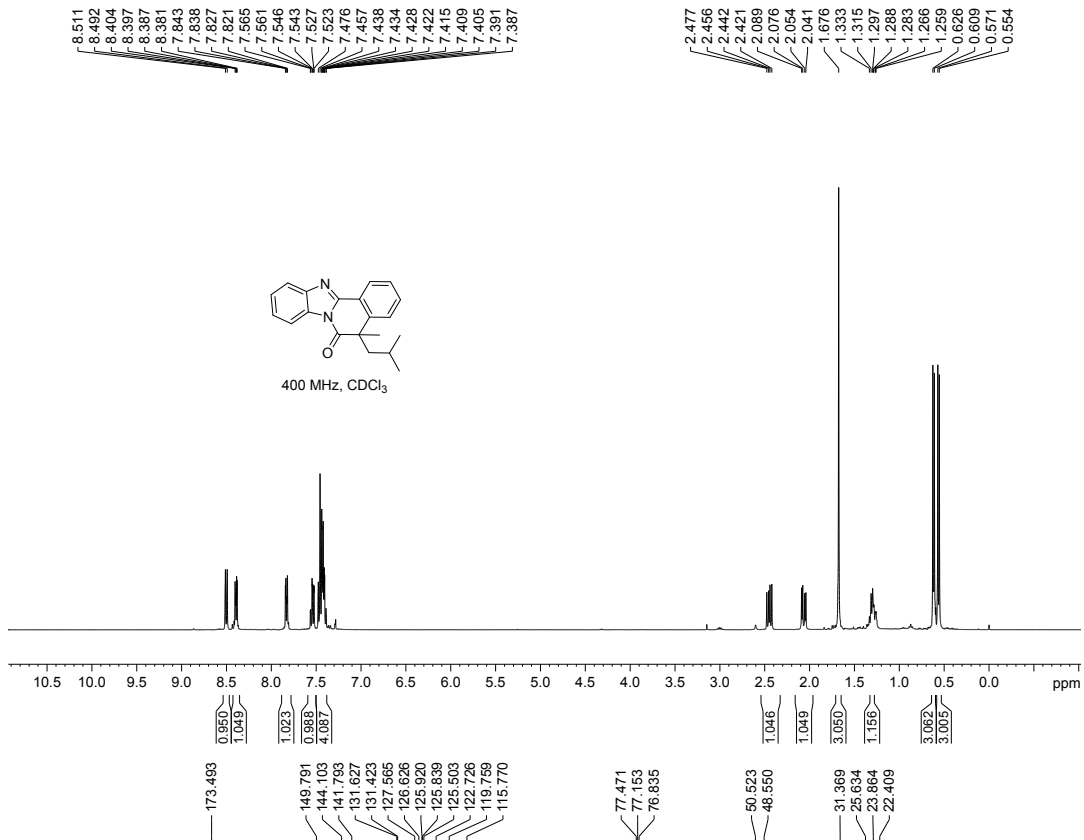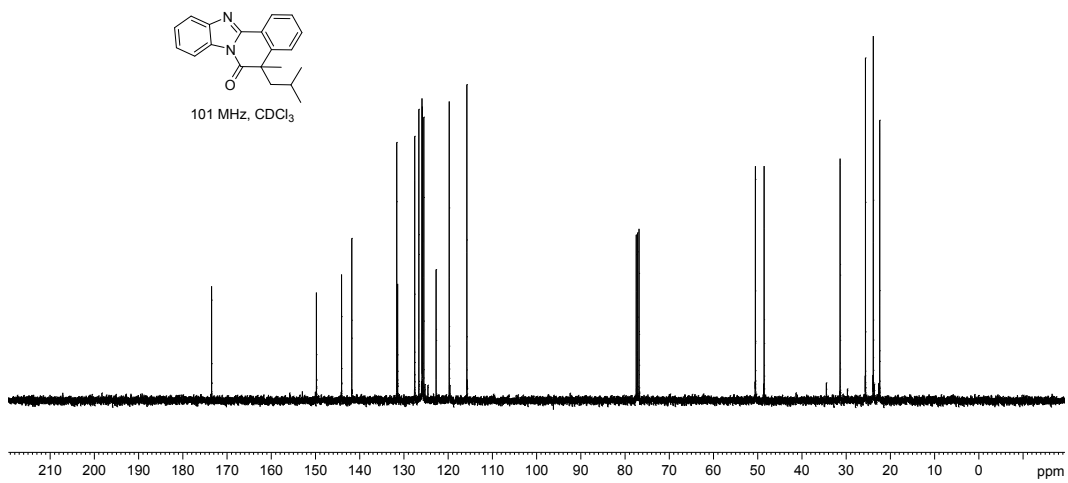

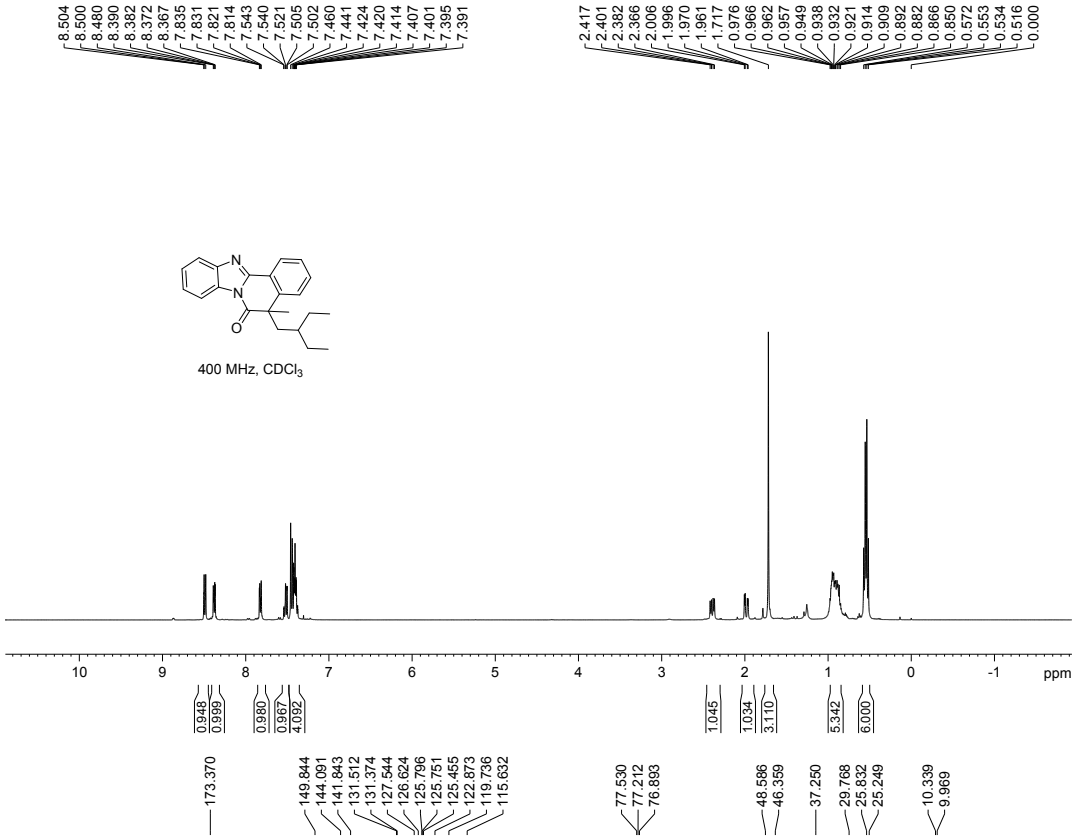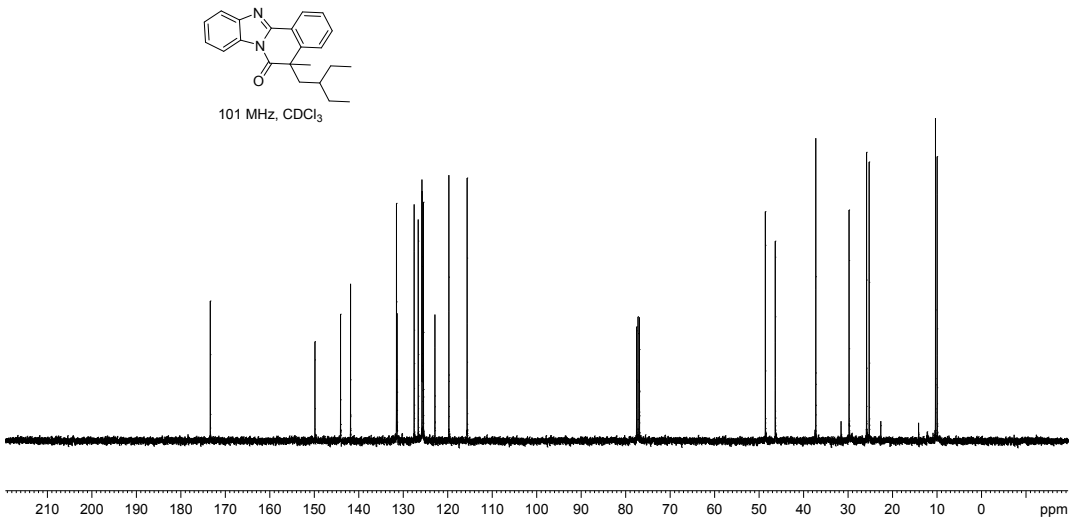

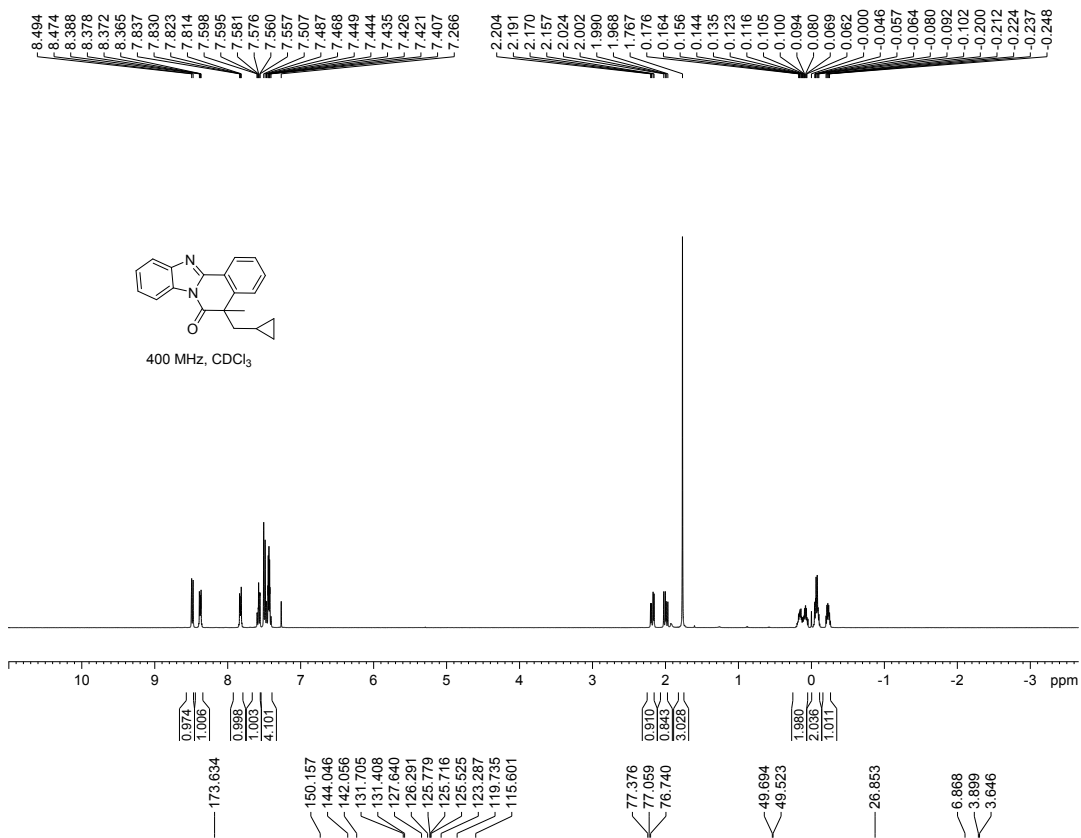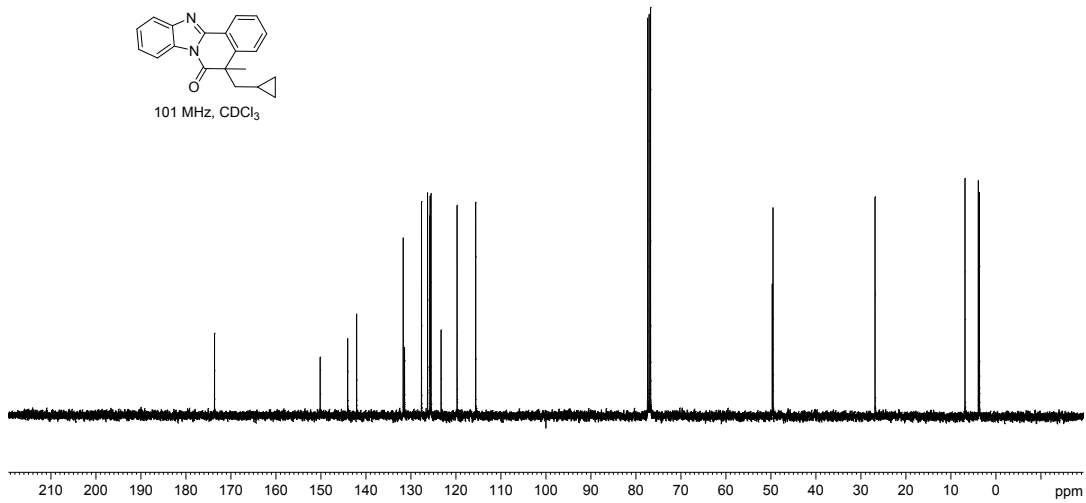

8.481  
8.477  
8.466  
8.459  
8.376  
8.369  
8.359  
8.354  
7.896  
7.890  
7.820  
7.813  
7.575  
7.572  
7.556  
7.551  
7.537  
7.534  
7.488  
7.473  
7.463  
7.453  
7.444  
7.440  
7.435  
7.428  
7.421  
7.416  
7.412  
7.387  
7.384  
7.269  
2.494  
2.474  
2.460  
2.440  
2.105  
2.089  
2.071  
2.055  
1.859  
1.841  
1.822  
1.737  
1.525  
1.513  
1.502  
1.487  
1.483  
1.477  
1.462  
1.444  
1.433  
1.425  
1.419  
1.408  
1.401  
1.325  
1.314  
1.305  
1.294  
1.282  
1.270  
0.000

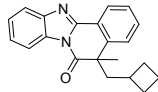

400 MHz, CDCl<sub>3</sub>

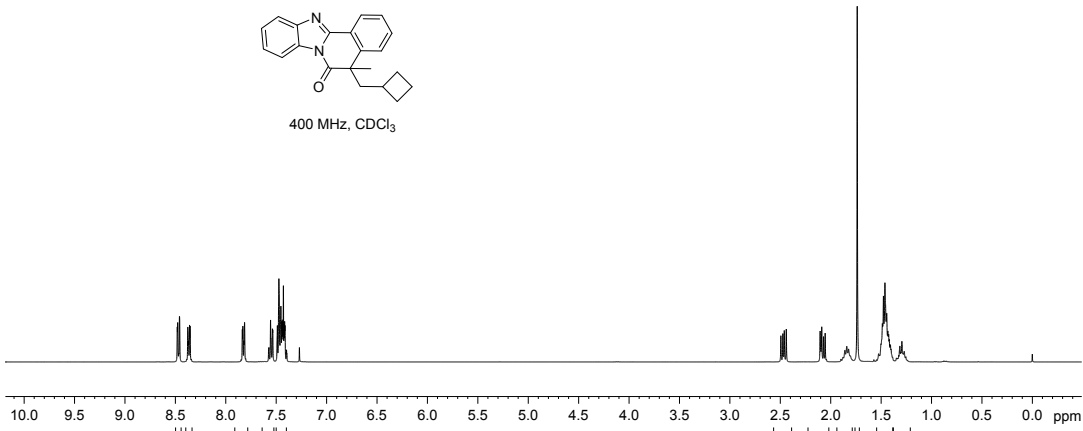

10.0 9.5 9.0 8.5 8.0 7.5 7.0 6.5 6.0 5.5 5.0 4.5 4.0 3.5 3.0 2.5 2.0 1.5 1.0 0.5 0.0 ppm

0.956  
1.000  
1.004  
1.040  
4.020  
173.342  
149.945  
144.037  
141.811  
131.617  
131.367  
127.626  
126.494  
125.843  
125.730  
125.535  
122.871  
119.757  
115.686  
77.402  
77.286  
77.084  
76.767  
51.342  
48.559  
32.854  
28.917  
28.513  
27.911  
18.634

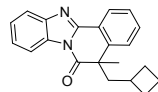

101 MHz, CDCl<sub>3</sub>

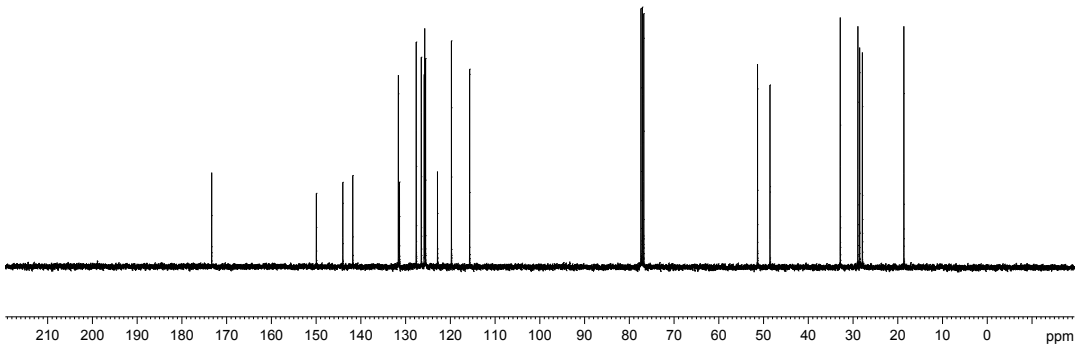

210 200 190 180 170 160 150 140 130 120 110 100 90 80 70 60 50 40 30 20 10 0 ppm

8.499  
8.495  
8.477  
8.400  
8.393  
8.383  
8.378  
7.844  
7.838  
7.829  
7.822  
7.595  
7.593  
7.576  
7.558  
7.555  
7.503  
7.482  
7.485  
7.473  
7.468  
7.489  
7.485  
7.451  
7.444  
7.436  
7.432  
7.428  
7.262  
2.556  
2.538  
2.522  
2.503  
2.212  
2.199  
2.178  
2.164  
1.731  
1.638  
1.390  
1.380  
1.370  
1.365  
1.310  
1.291  
1.274  
1.263  
1.256  
1.246  
1.233  
1.217  
1.202  
1.196  
1.187  
1.175  
1.167  
1.155  
0.967  
0.941  
0.816  
0.812  
0.789  
0.790  
-0.000

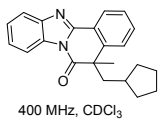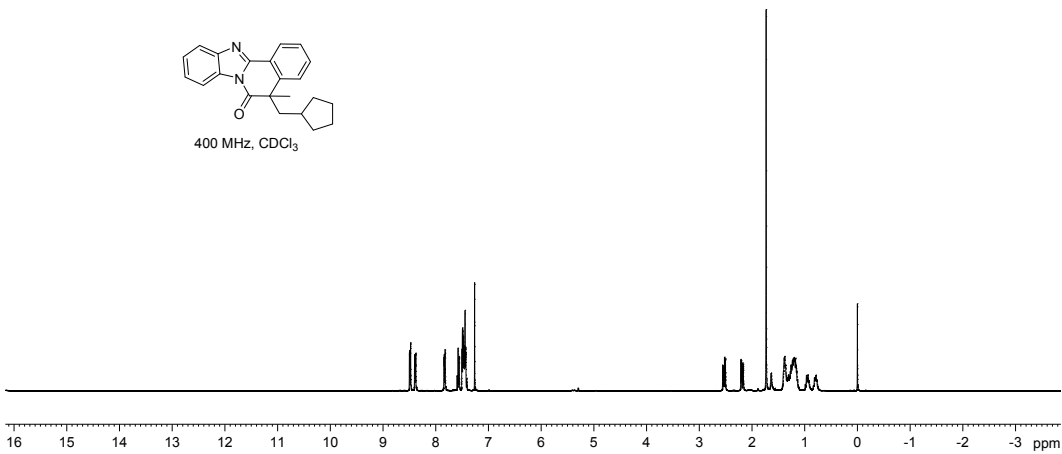

173.627  
149.942  
144.082  
142.082  
131.635  
131.409  
127.611  
126.628  
125.867  
125.847  
125.533  
122.808  
119.746  
115.800

77.347  
77.030  
76.712

49.142  
48.114  
37.504  
33.589  
32.418  
30.113  
24.872  
24.593

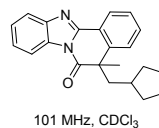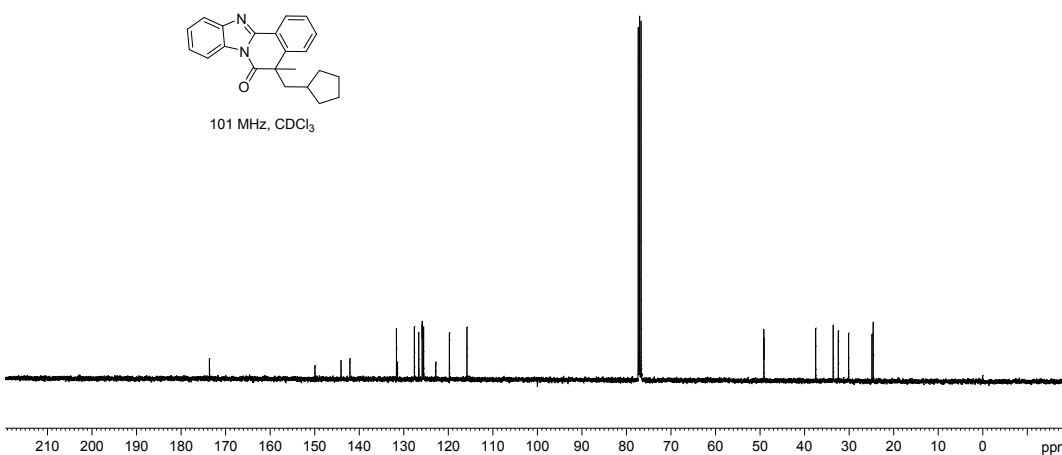

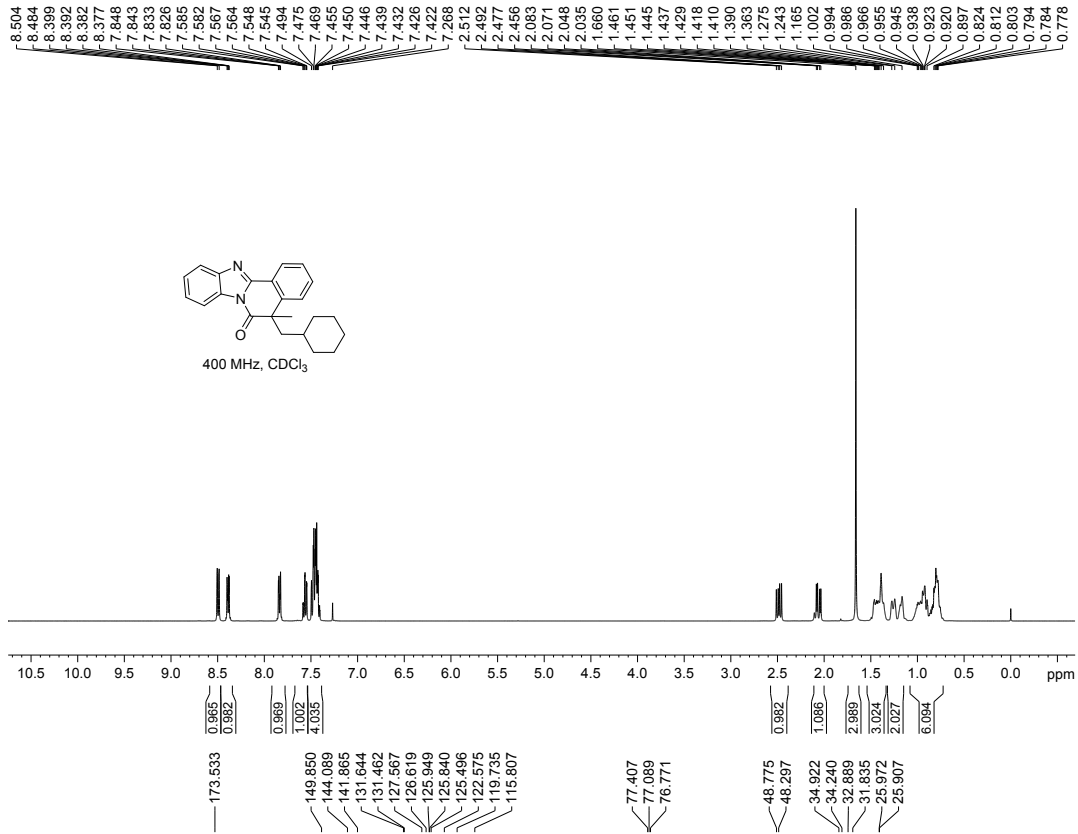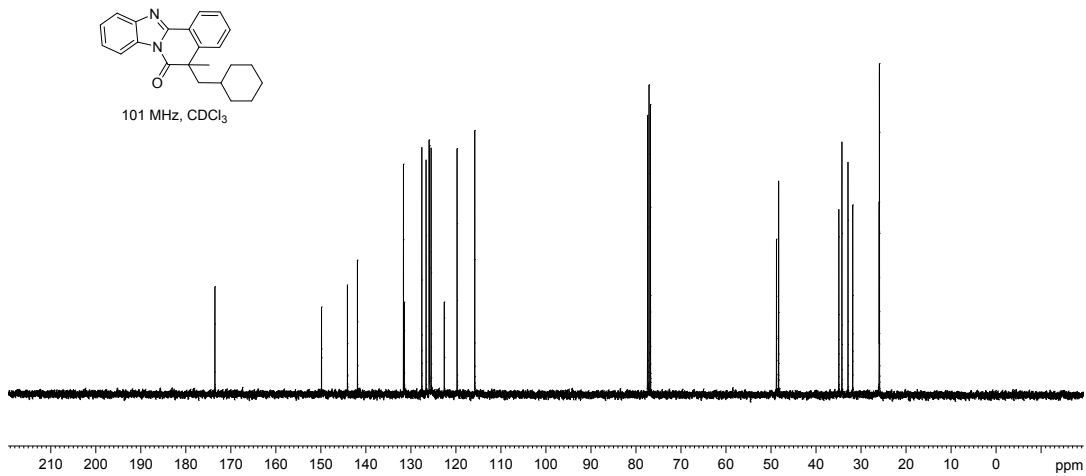



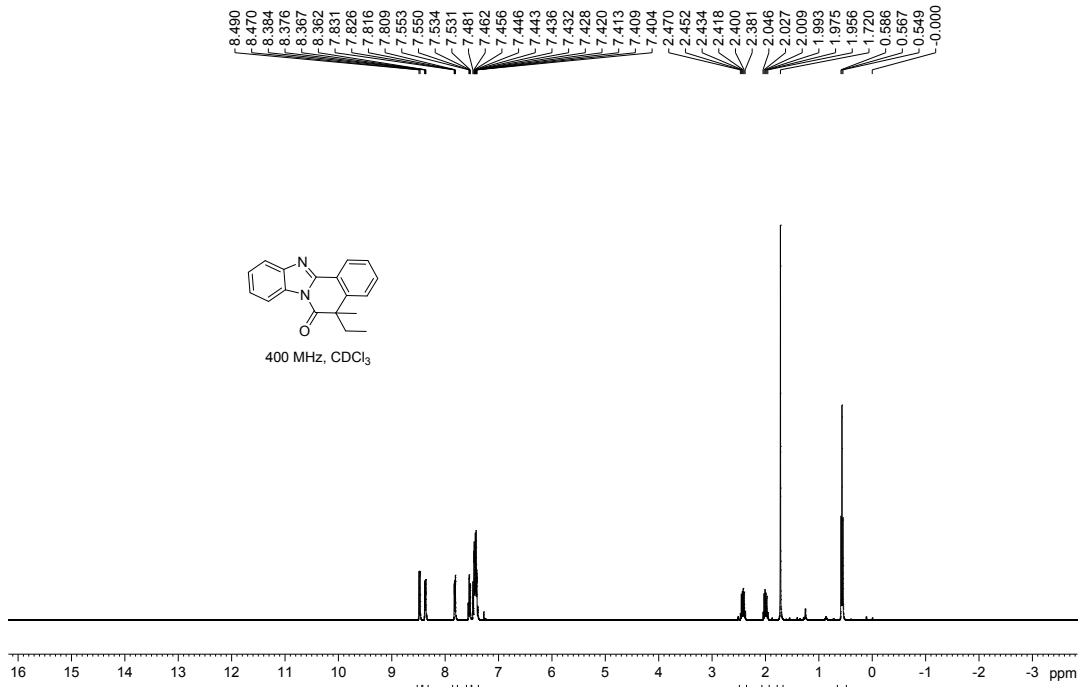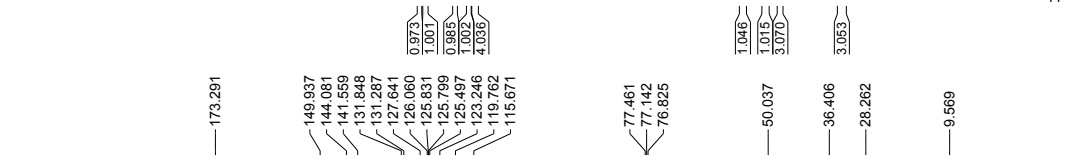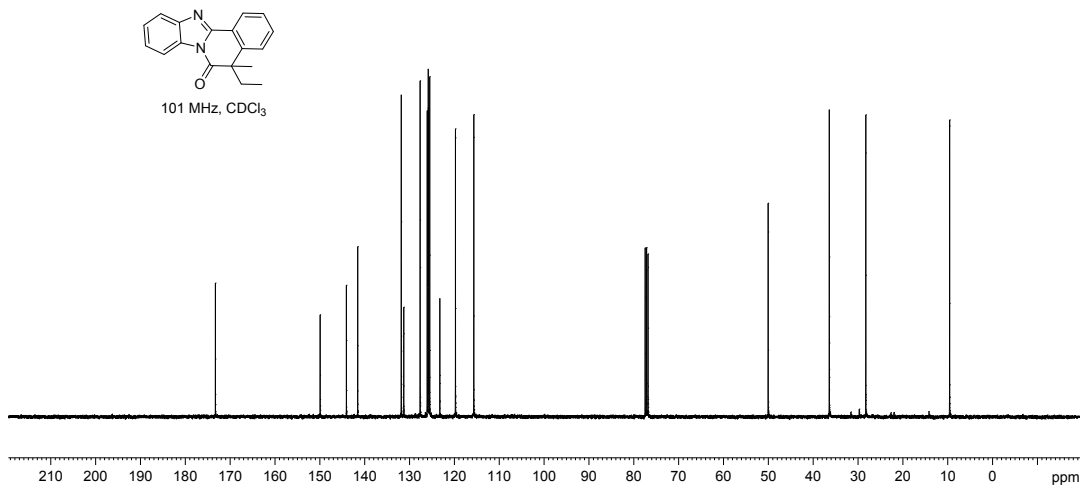

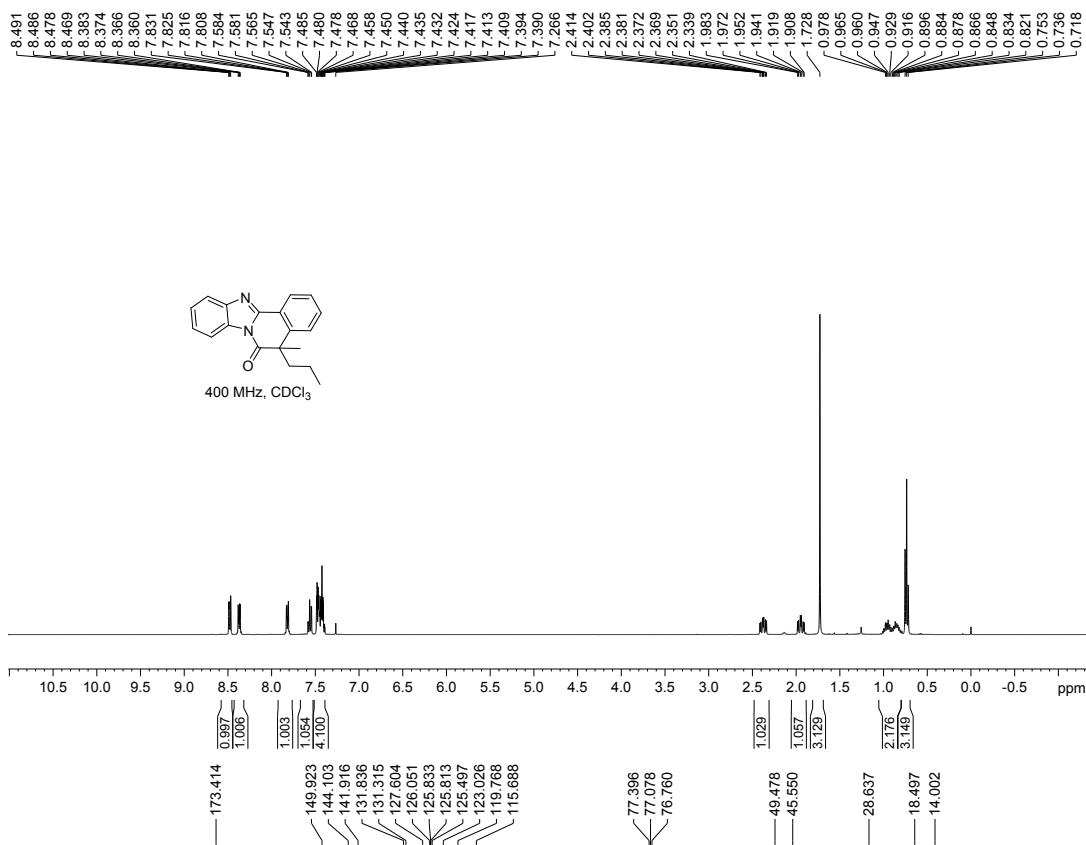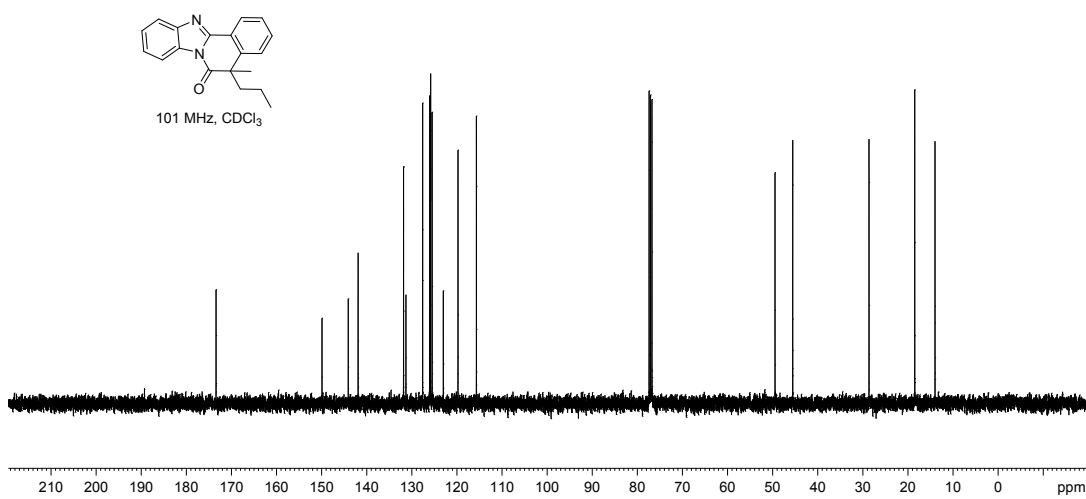

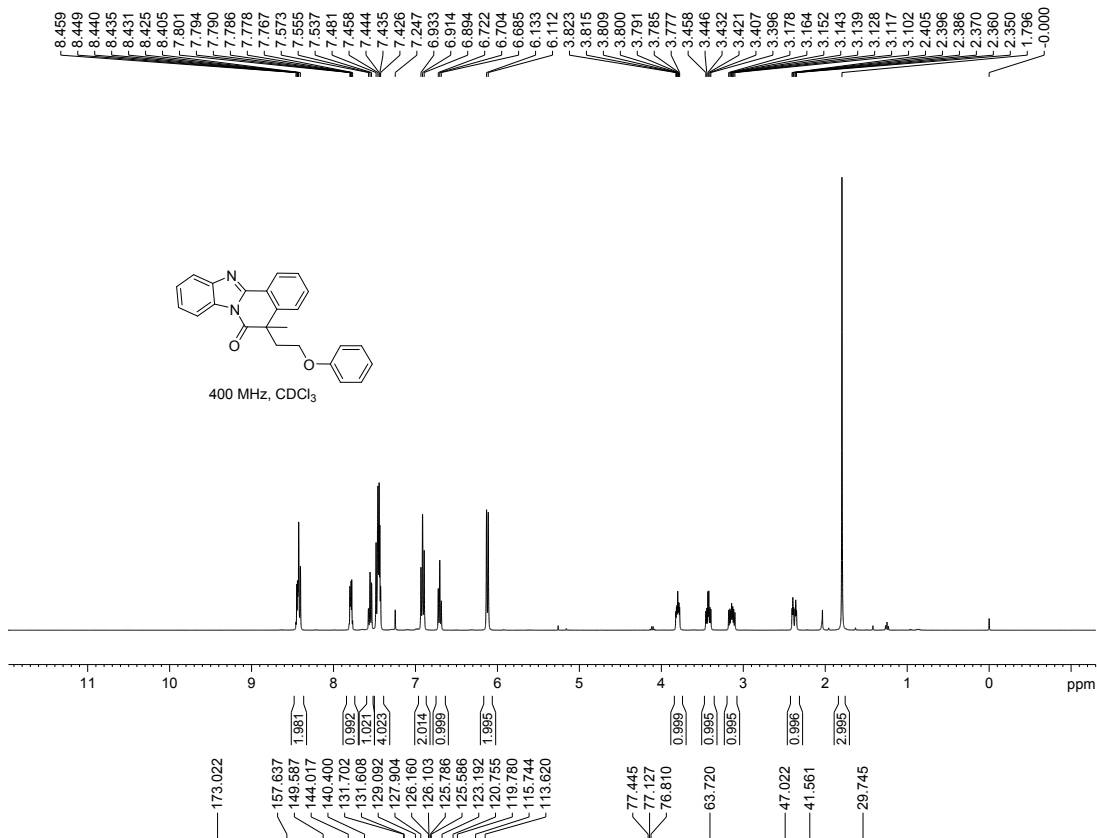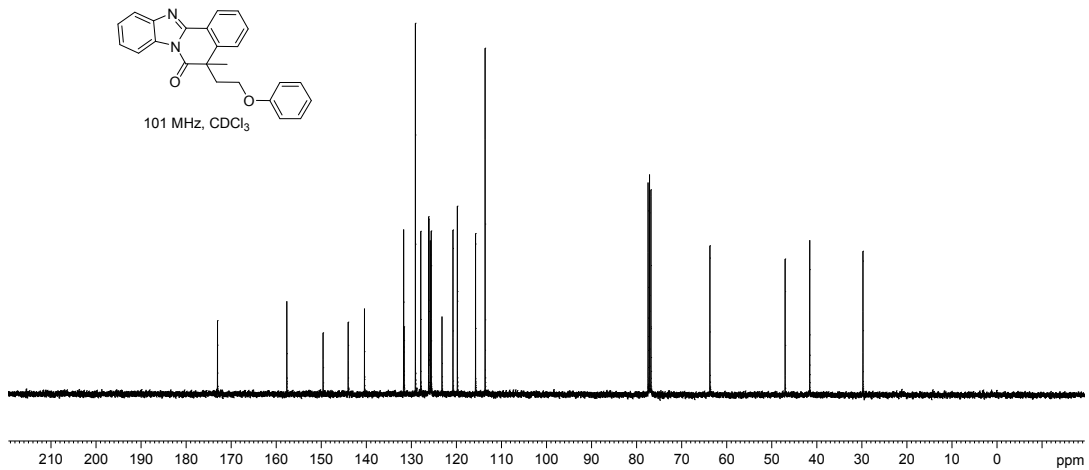

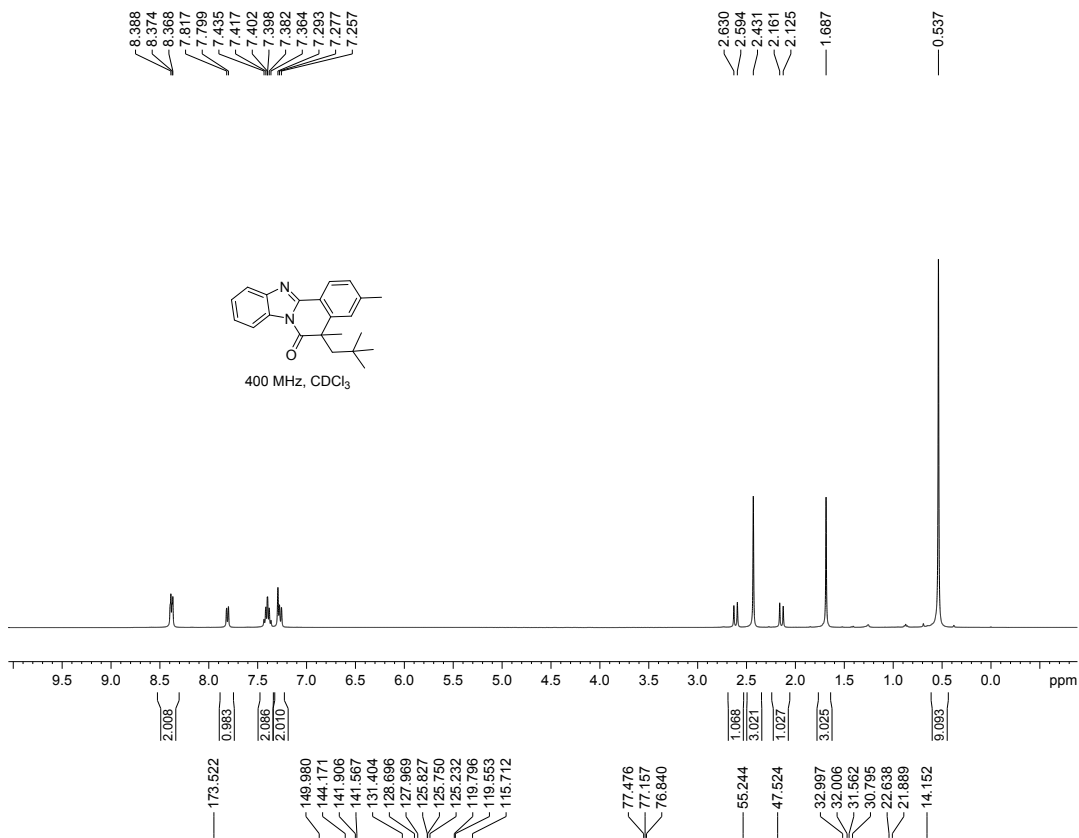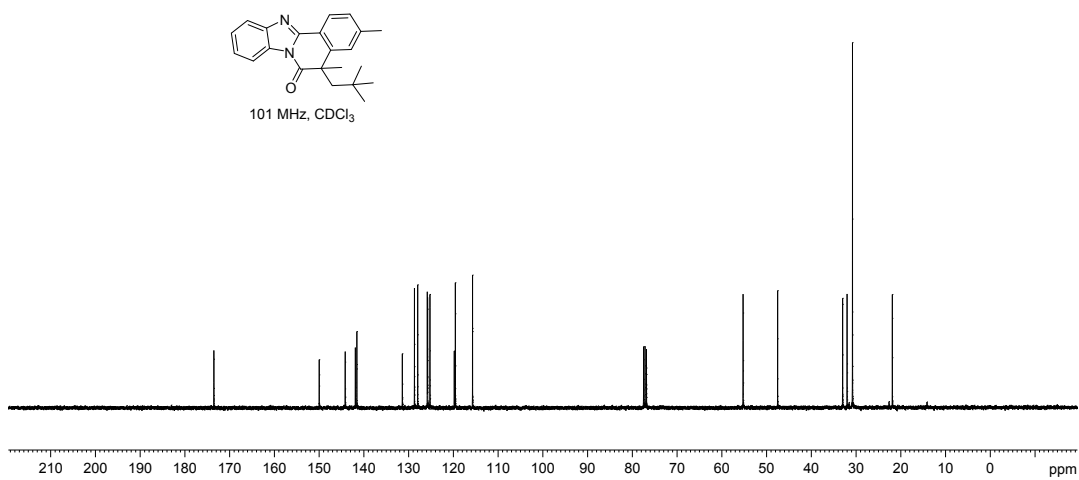

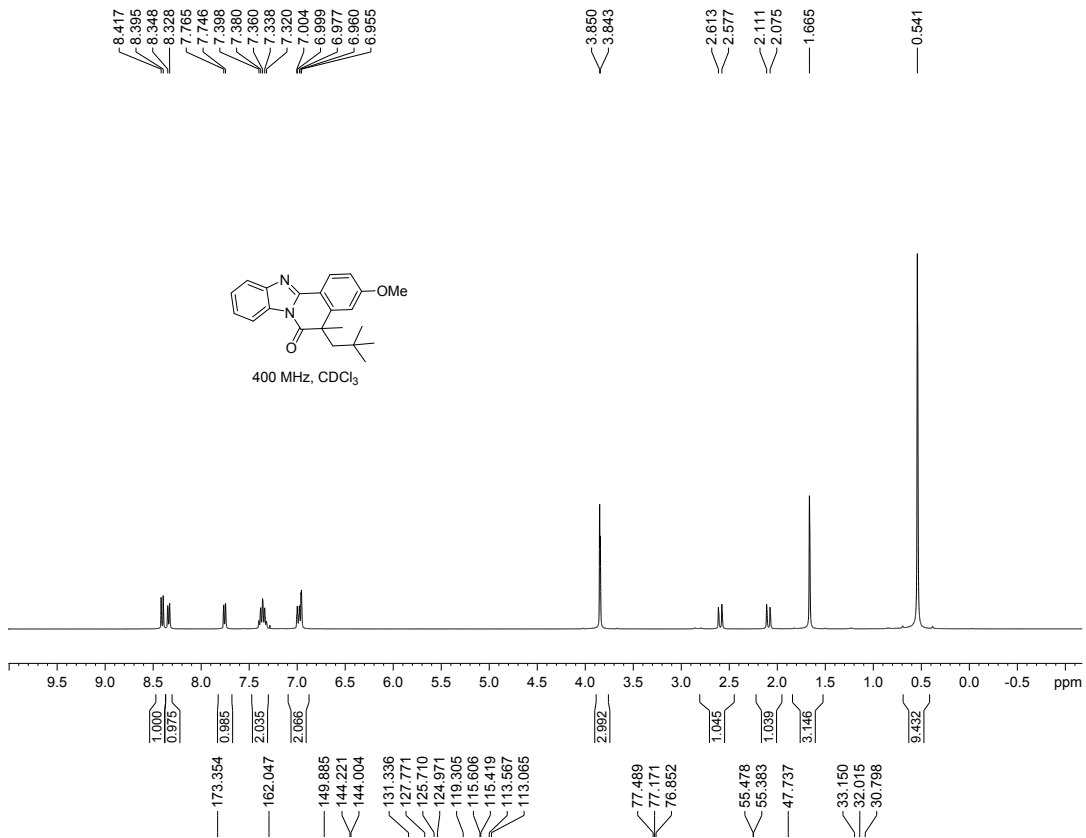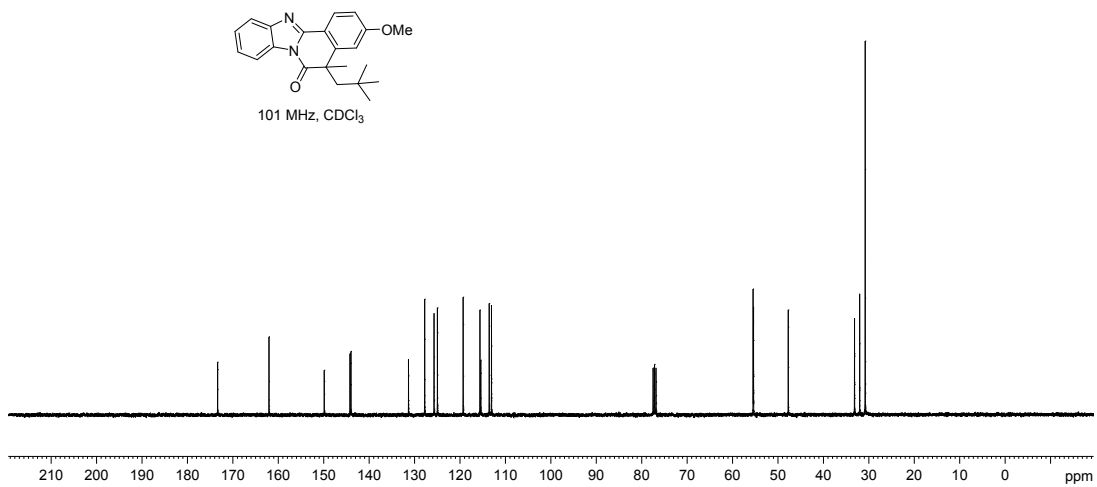

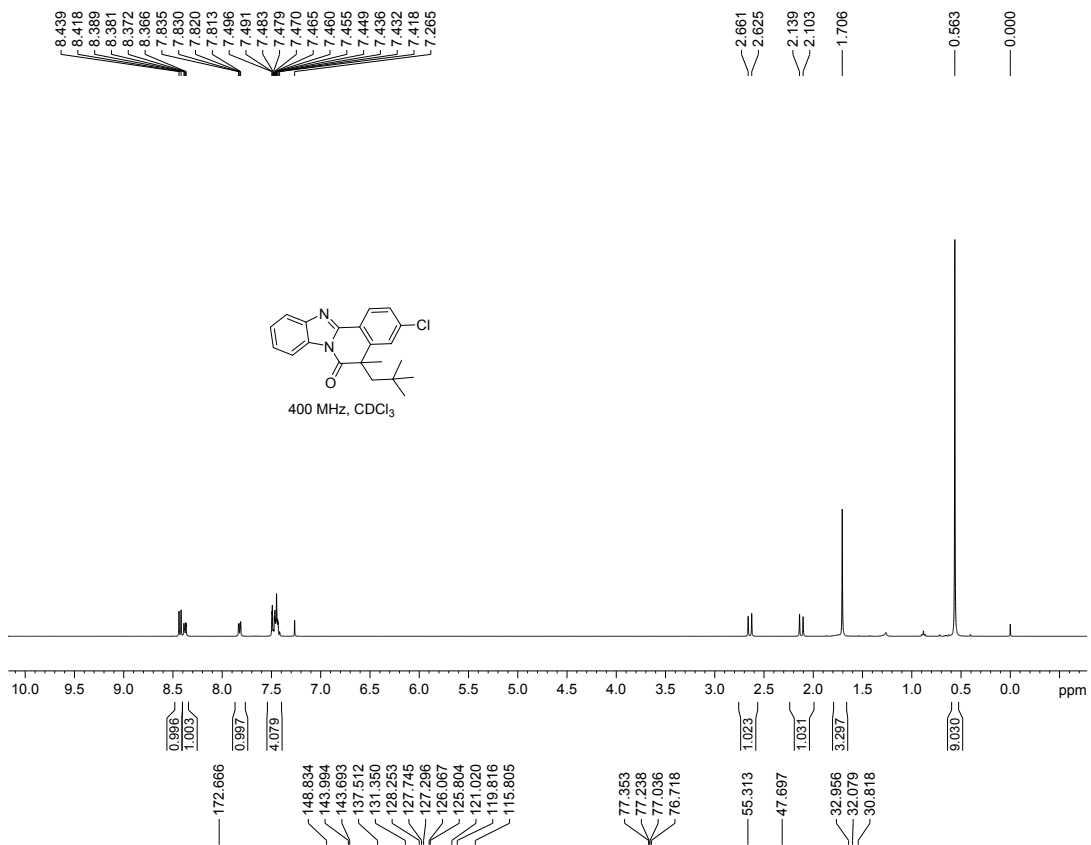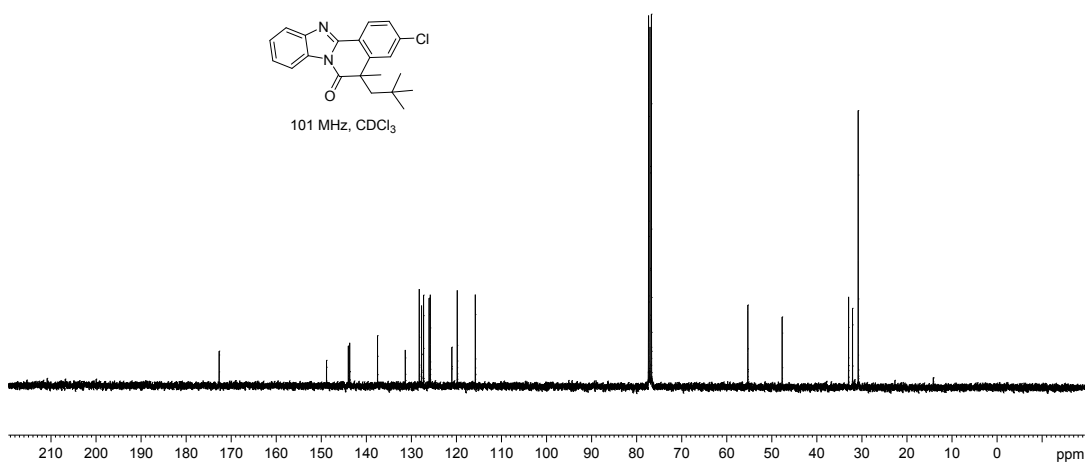

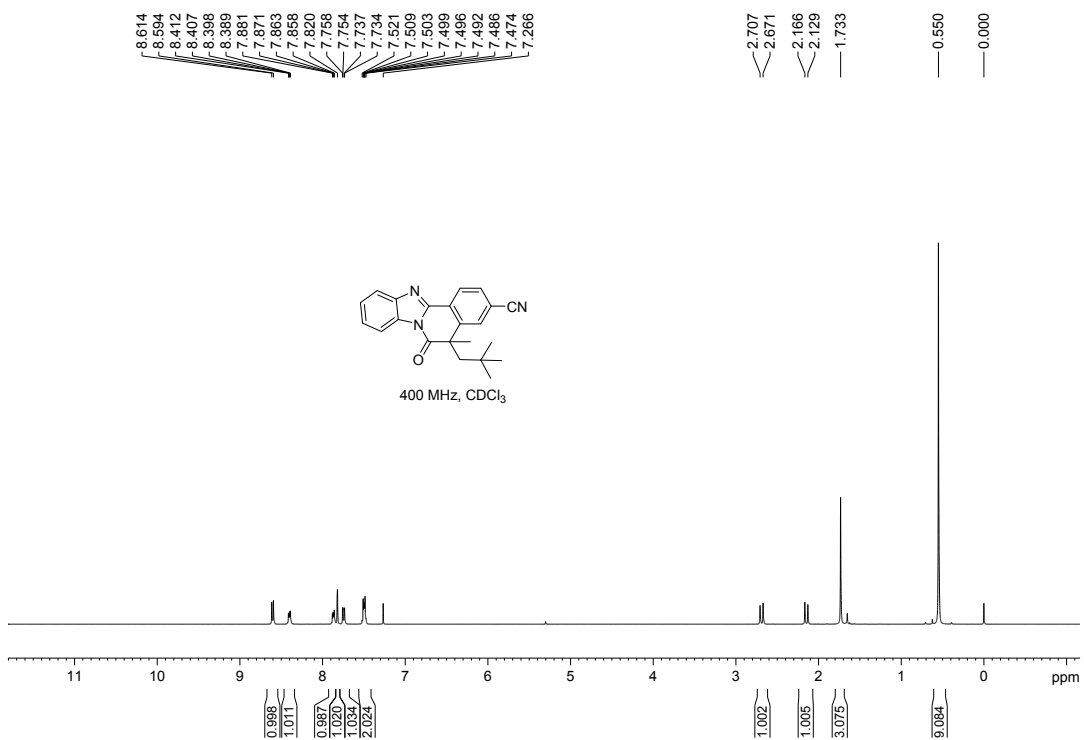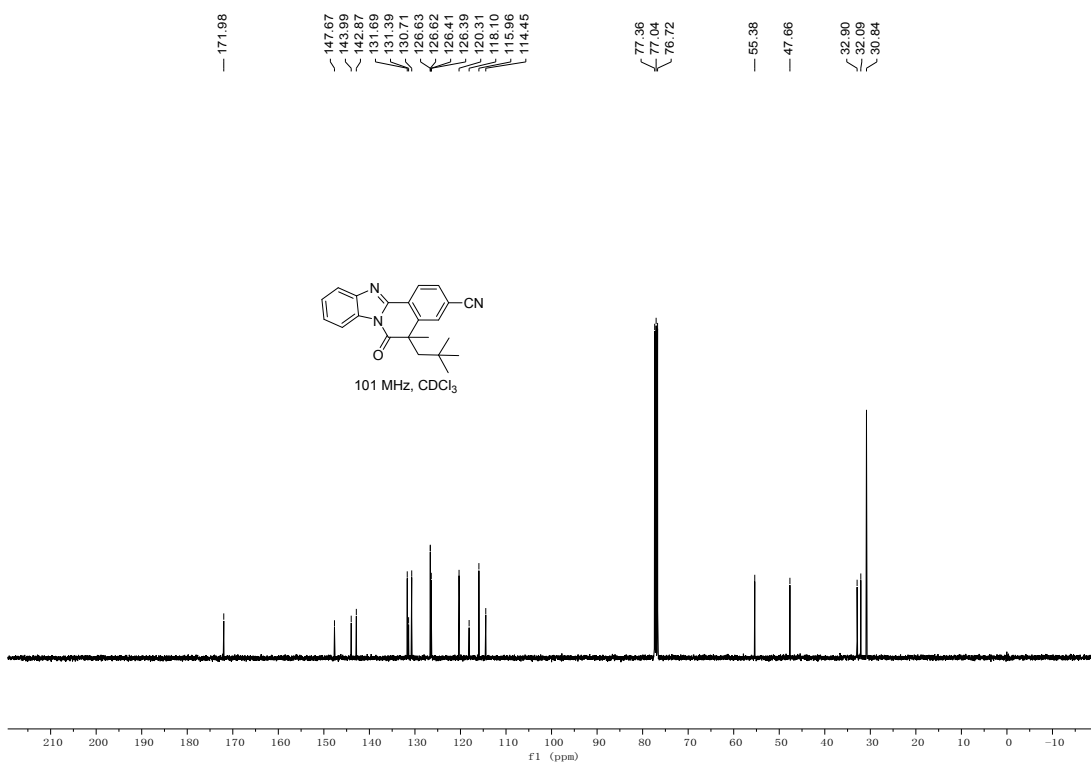

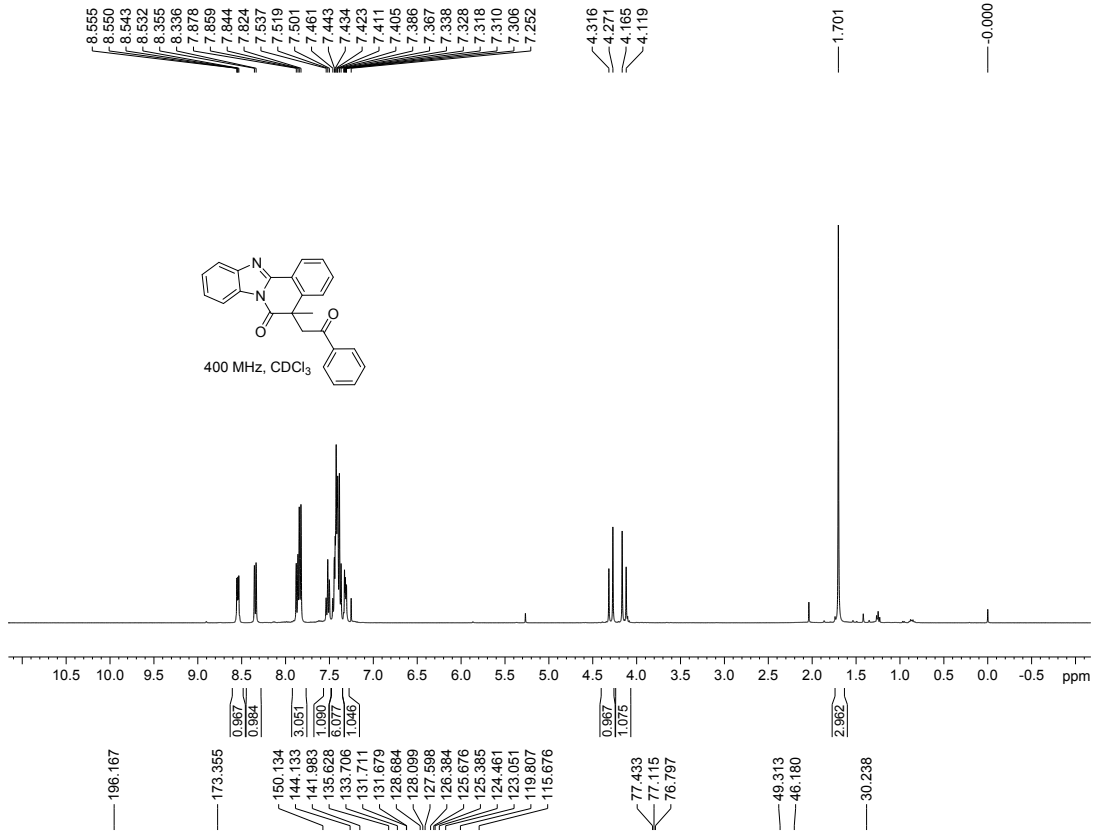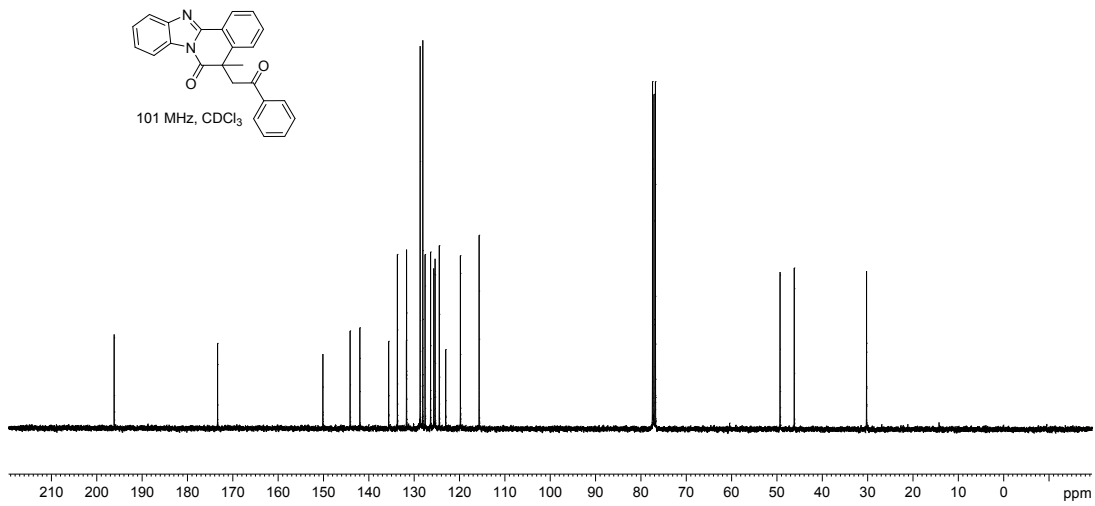



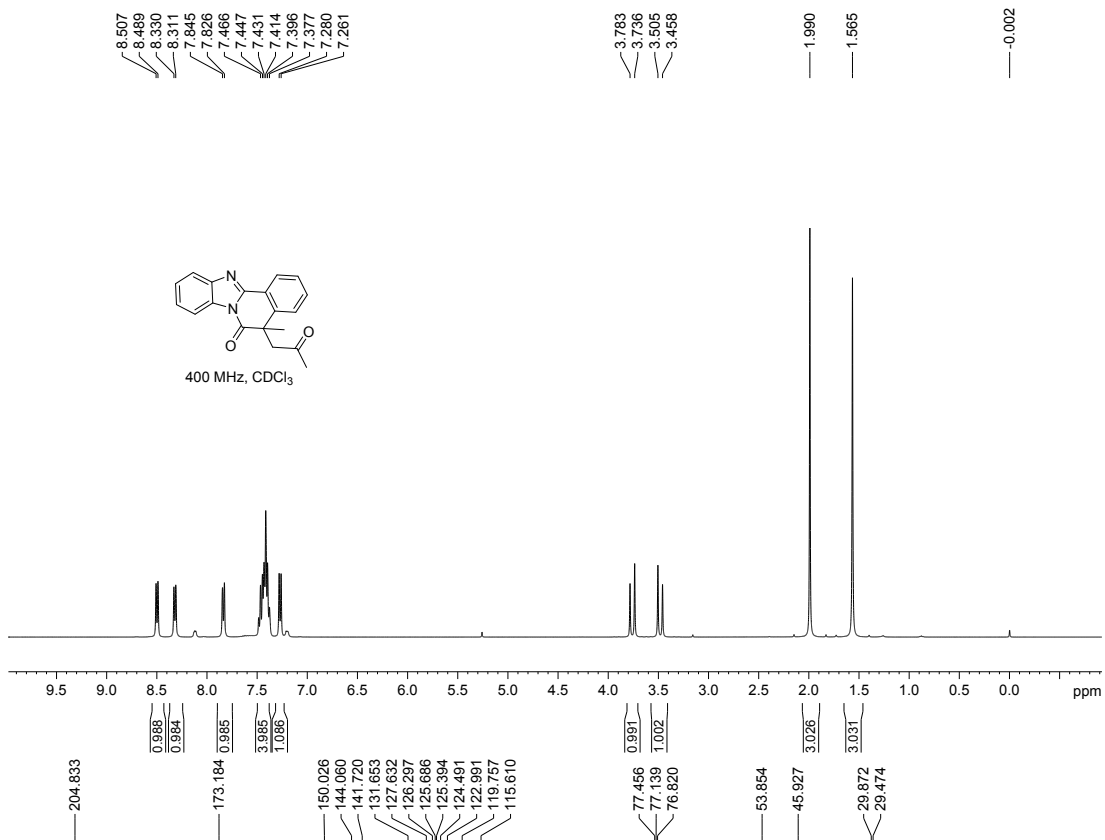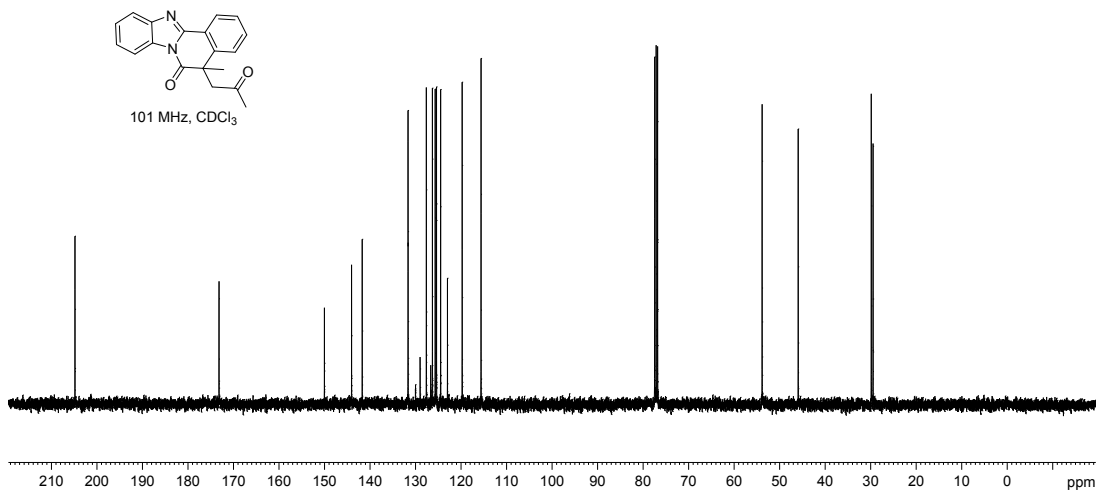

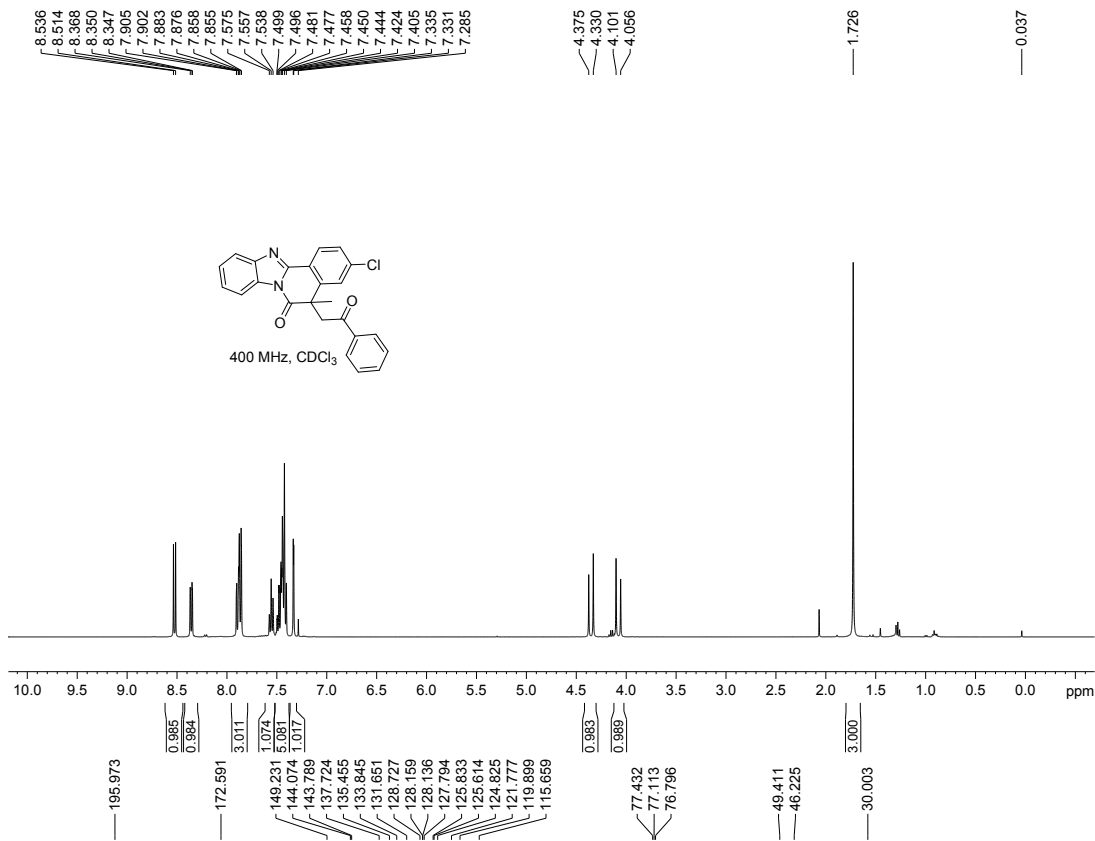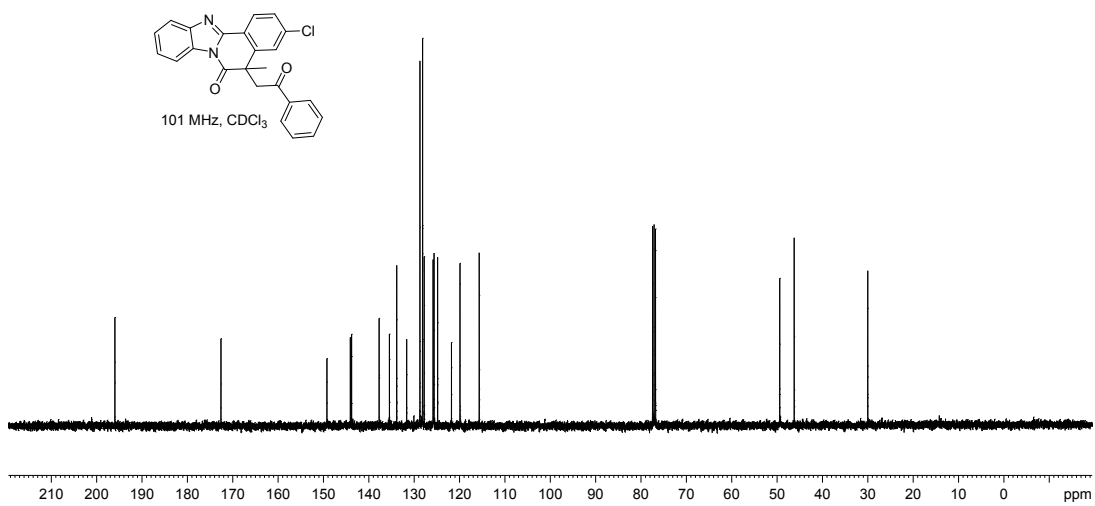

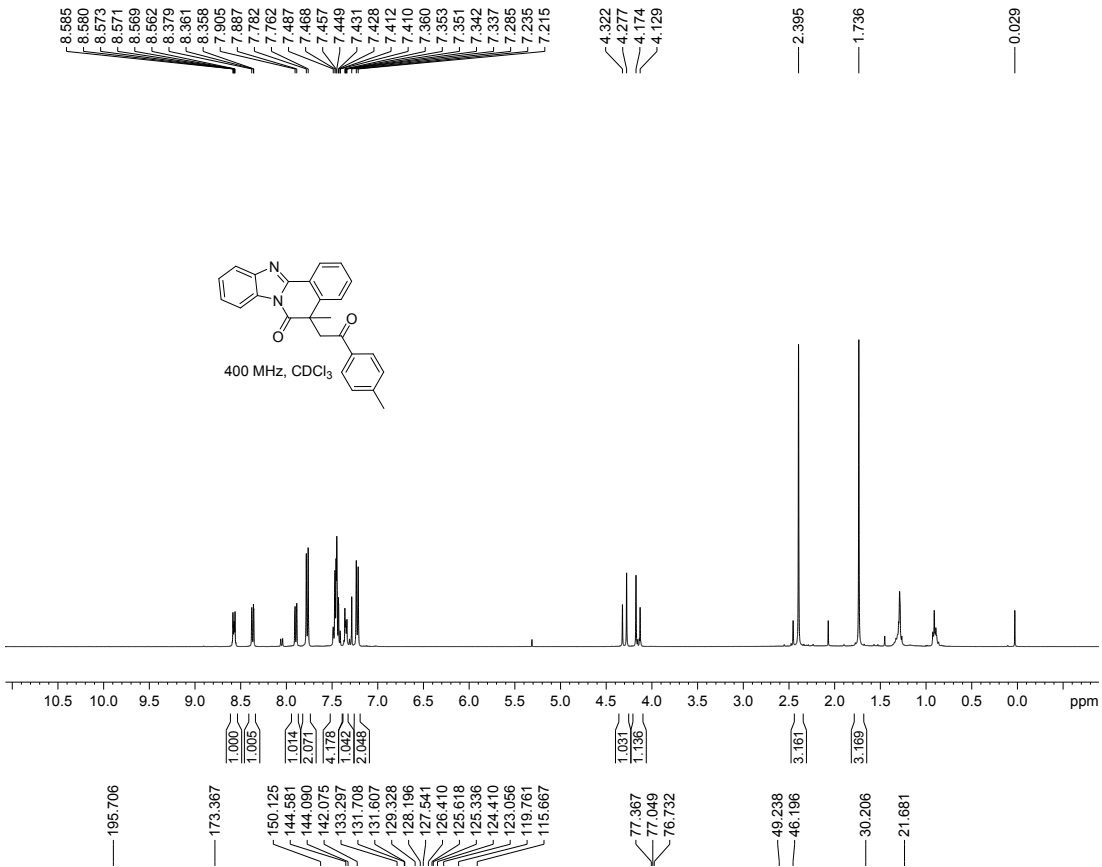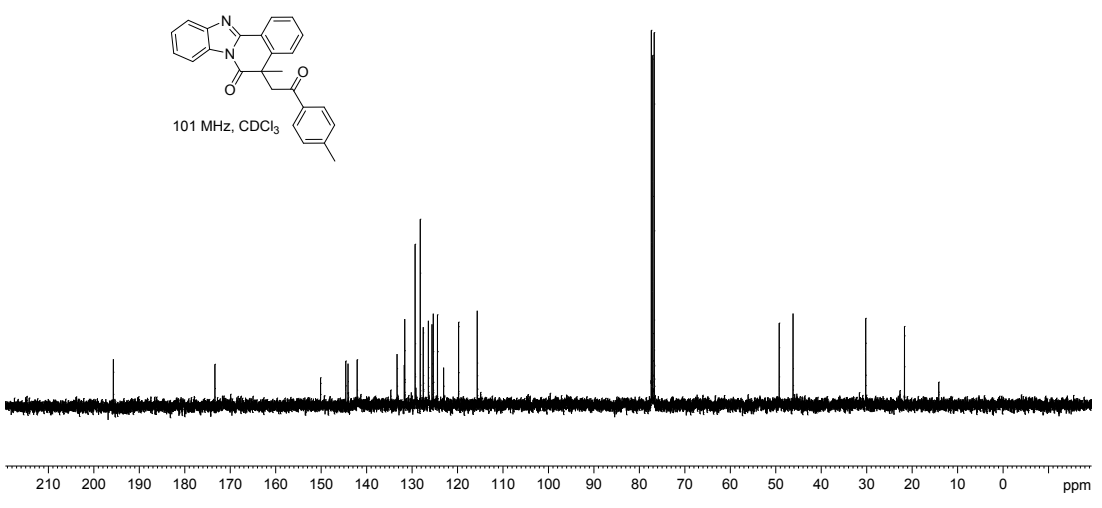

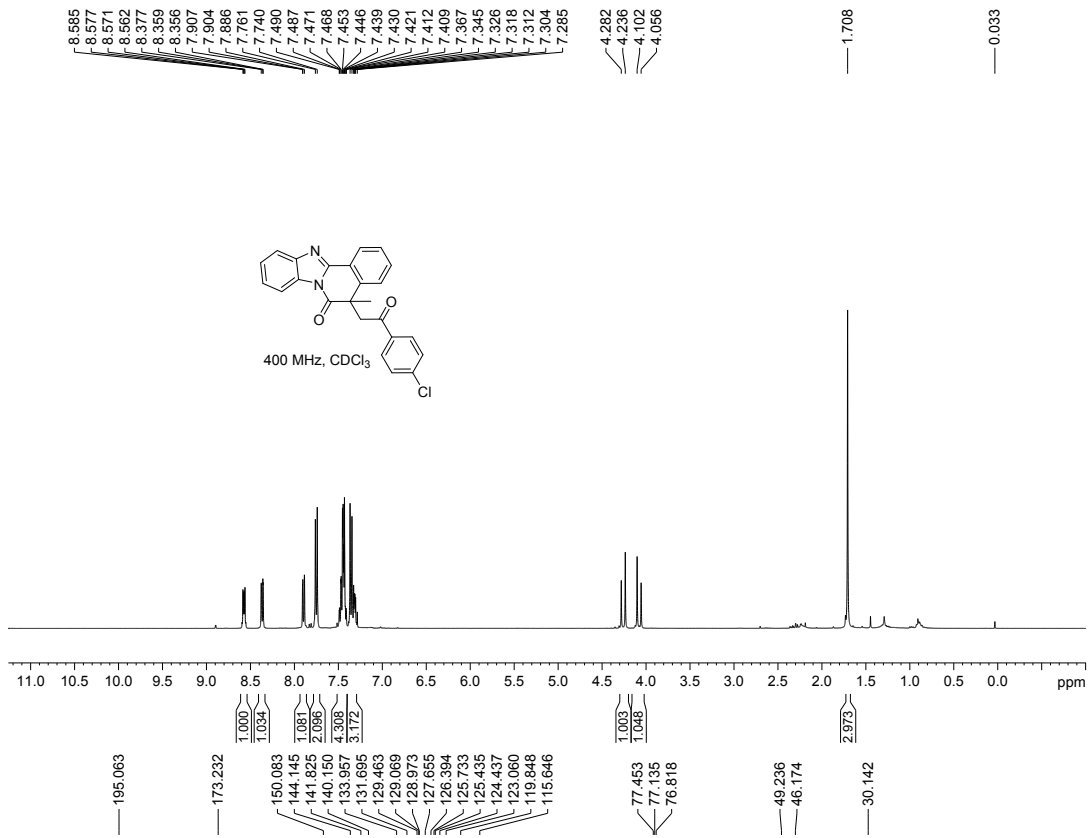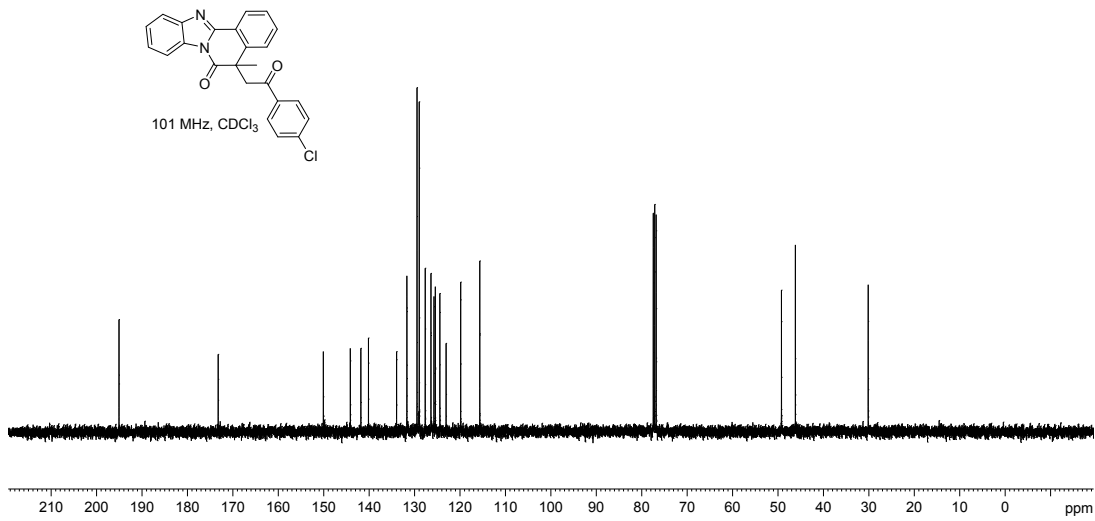

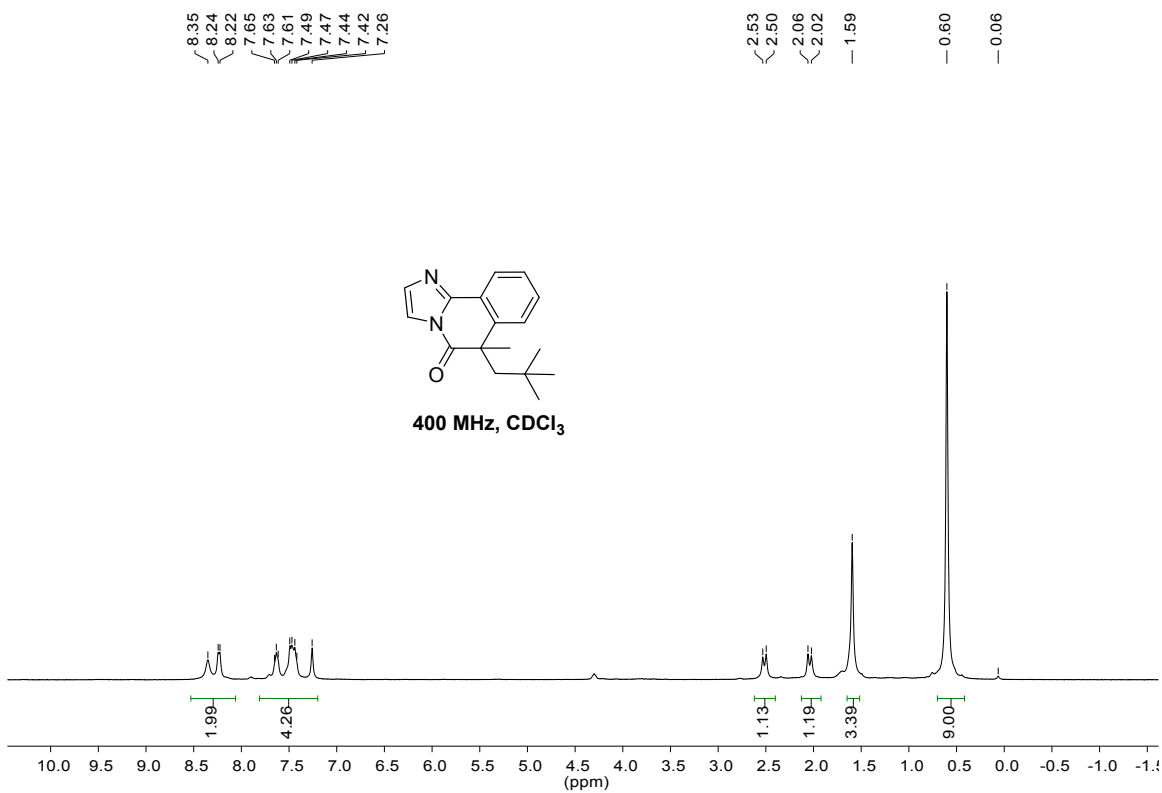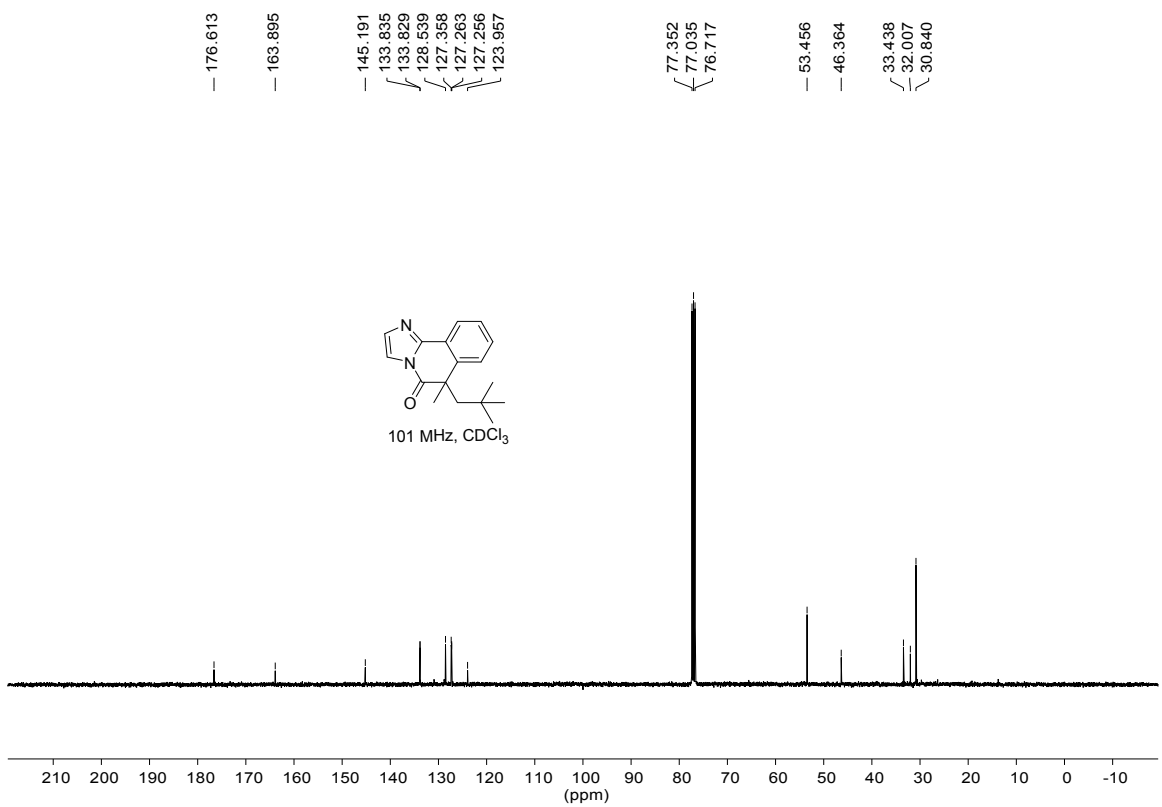

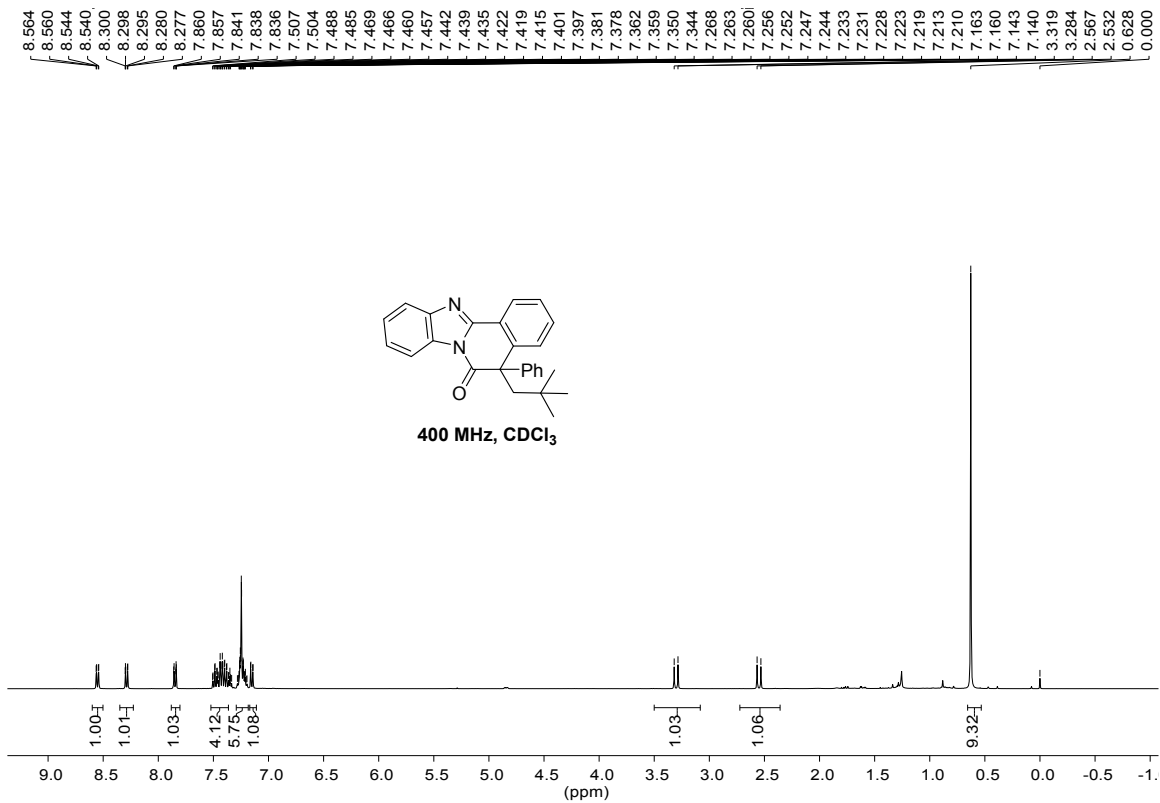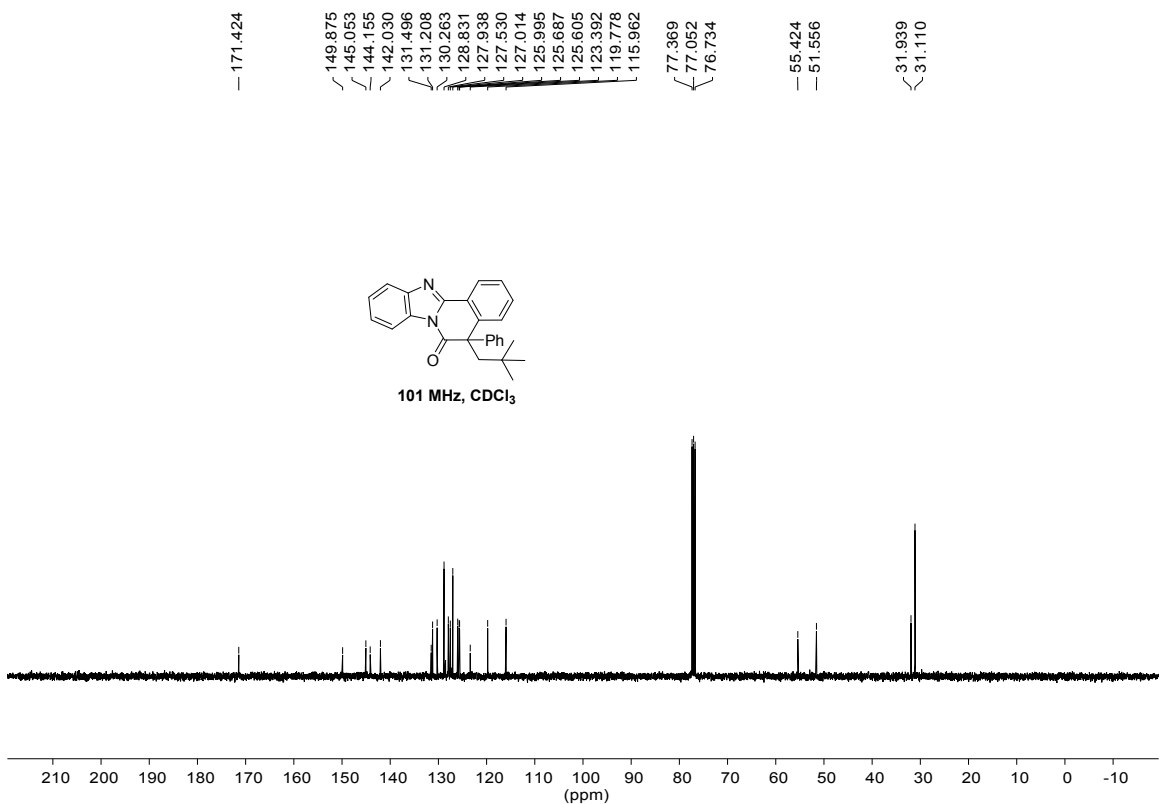

## 6. Crystal data and structure refinement for compound 3a.

|                                             |                                                               |
|---------------------------------------------|---------------------------------------------------------------|
| Empirical formula                           | C <sub>21</sub> H <sub>22</sub> N <sub>2</sub> O              |
| Formula weight                              | 318.40                                                        |
| Temperature/K                               | 293(2)                                                        |
| Crystal system                              | orthorhombic                                                  |
| Space group                                 | Pbca                                                          |
| a/Å                                         | 16.5024(4)                                                    |
| b/Å                                         | 11.1420(2)                                                    |
| c/Å                                         | 19.3013(5)                                                    |
| $\alpha$ /°                                 | 90                                                            |
| $\beta$ /°                                  | 90                                                            |
| $\gamma$ /°                                 | 90                                                            |
| Volume/Å <sup>3</sup>                       | 3548.93(14)                                                   |
| Z                                           | 8                                                             |
| $\rho_{\text{calc}}/\text{cm}^3$            | 1.192                                                         |
| $\mu/\text{mm}^{-1}$                        | 0.575                                                         |
| F(000)                                      | 1360.0                                                        |
| Crystal size/mm <sup>3</sup>                | 0.21 × 0.2 × 0.15                                             |
| Radiation                                   | CuK $\alpha$ ( $\lambda$ = 1.54184)                           |
| 2 $\theta$ range for data collection/°      | 9.164 to 135.468                                              |
| Index ranges                                | -19 ≤ h ≤ 19, -10 ≤ k ≤ 13, -22 ≤ l ≤ 14                      |
| Reflections collected                       | 13149                                                         |
| Independent reflections                     | 3164 [R <sub>int</sub> = 0.0242, R <sub>sigma</sub> = 0.0169] |
| Data/restraints/parameters                  | 3164/13/221                                                   |
| Goodness-of-fit on F <sup>2</sup>           | 1.070                                                         |
| Final R indexes [I ≥ 2 $\sigma$ (I)]        | R <sub>1</sub> = 0.0468, wR <sub>2</sub> = 0.1327             |
| Final R indexes [all data]                  | R <sub>1</sub> = 0.0564, wR <sub>2</sub> = 0.1428             |
| Largest diff. peak/hole / e Å <sup>-3</sup> | 0.17/-0.18                                                    |

## 7. Computational Details

All the theoretical calculations in the study were performed using Gaussian16 program package<sup>1</sup>. All the geometries were optimized at the B3LYP<sup>2</sup>/DZVP<sup>3</sup> level, and the solvent effect was utilized the polarizable continuum model (PCM) in water solvent.<sup>4</sup> And the harmonic vibrational frequency calculations were performed at the same level to confirm the local minima and transition state.

The solution translational entropy correction has been calculated with THERMO

program, <sup>5</sup> which is based on the free volume that a solute molecule could move along three axes within the cavity.

### References:

- [1] Frisch, M. J.; Trucks, G. W.; Schlegel, H. B.; Scuseria, G. E.; Robb, M. A.; Cheeseman, J. R.; Scalmani, G.; Barone, V.; Petersson, G. A.; Nakatsuji, H.; Li, X.; Caricato, M.; Marenich, A. V.; Bloino, J.; Janesko, B. G.; Gomperts, R.; Mennucci, B.; Hratchian, H. P.; Ortiz, J. V.; Izmaylov, A. F.; Sonnenberg, J. L.; Williams-Young, D.; Ding, F.; Lipparini, F.; Egidi, F.; Goings, J.; Peng, B.; Petrone, A.; Henderson, T.; Ranasinghe, D.; Zakrzewski, V. G.; Gao, J.; Rega, N.; Zheng, G.; Liang, W.; Hada, M.; Ehara, M.; Toyota, K.; Fukuda, R.; Hasegawa, J.; Ishida, M.; Nakajima, T.; Honda, Y.; Kitao, O.; Nakai, H.; Vreven, T.; Throssell, K.; Montgomery Jr., J. A.; Peralta, J. E.; Ogliaro, F.; Bearpark, M. J.; Heyd, J. J.; Brothers, E. N.; Kudin, K. N.; Staroverov, V. N.; Keith, T. A.; Kobayashi, R.; Normand, J.; Raghavachari, K.; Rendell, A. P.; Burant, J. C.; Iyengar, S. S.; Tomasi, J.; Cossi, M.; Millam, J. M.; Klene, M.; Adamo, C.; Cammi, R.; Ochterski, J. W.; Martin, R. L.; Morokuma, K.; Farkas, O.; Foresman, J. B.; Fox, D. J. *Gaussian16*, Gaussian, Inc., Wallingford, CT, **2016**.
- [2] (a) Lee, C.; Yang, W.; Parr, R.G.; Development of the Colle-Salvetti Correlation-Energy Formula into a Functional of the Electron Density, *Phys. Rev. B: Condens. Matter Mater. Phys.* **1988**, *37*, 785-789; (b) Becke, A.D. Density-Functional Thermochemistry. III. The role of Exact Exchange, *J. Chem. Phys.* **1993**, *98*, 5648-5652.
- [3] (a) Godbout, N.; Salahub, D. R.; Andzelm, J.; Wimmer, E. Optimization of Gaussian-Type Basis-Sets for Local Spin-Density Functional Calculations. I. Boron Through Neon, Optimization Technique and Validation, *Can. J. Chem.* **1992**, *70*, 560–571. (b) Sosa, C.; Andzelm, J.; Elkin, B. C.; Wimmer, E.; Dobbs, K. D.; Dixon, D. A. A Local Density Functional Study of the Structure and Vibrational Frequencies of Molecular Transition-Metal Compounds, *J. Phys. Chem.* **1992**, *96*, 6630–6636.
- [4] Scalmani, G.; Frisch, M. J. Continuous Surface Charge Polarizable Continuum Models of Solvation. I. General formalism, *J. Chem. Phys.* **2010**, *132*, 114110-24.
- [5] Fang, D.-C. THERMO; Beijing Normal University, Beijing, People’s Republic of China, 2013.

### 7.1 The energies, entropies and Gibbs free energies of Stationary Points

| Species     | E(a.u.)    | S(cal/mol/K) | G(a.u.)    |
|-------------|------------|--------------|------------|
| <b>1a</b>   | -841.04855 | <b>104.2</b> | -840.81182 |
| <b>5</b>    | -157.81299 | <b>54.0</b>  | -157.71473 |
| <b>TS1</b>  | -998.85905 | <b>137.4</b> | -998.51283 |
| <b>6</b>    | -998.90193 | <b>129.3</b> | -998.54781 |
| <b>TS2</b>  | -998.87699 | <b>123.2</b> | -998.52137 |
| <b>7</b>    | -998.89617 | <b>121.6</b> | -998.53787 |
| <b>TS2'</b> | -998.84741 | <b>124.9</b> | -998.49324 |
| <b>7'</b>   | -998.86688 | <b>125.2</b> | -998.51095 |

### 7.2 Coordinates of Stationary Points



|           |          |          |          |
|-----------|----------|----------|----------|
| <b>1a</b> |          |          |          |
| C         | -1.70165 | -0.43418 | -0.02832 |
| C         | -1.40539 | -1.80902 | 0.10625  |
| C         | -2.43421 | -2.75819 | 0.18458  |
| C         | -3.75091 | -2.30208 | 0.10847  |
| C         | -4.03506 | -0.93006 | -0.05177 |
| C         | -3.01843 | 0.02746  | -0.13013 |
| C         | 0.51806  | -0.82162 | -0.00107 |
| H         | -2.20350 | -3.81457 | 0.29215  |
| H         | -4.57124 | -3.01250 | 0.16511  |
| H         | -5.06929 | -0.60364 | -0.11934 |
| H         | -3.26098 | 1.07504  | -0.27032 |
| N         | -0.44519 | 0.20570  | -0.09292 |
| N         | -0.02815 | -2.00703 | 0.13388  |
| C         | 1.97609  | -0.59975 | 0.05187  |
| C         | 2.54393  | 0.46220  | 0.77770  |
| C         | 2.82261  | -1.52502 | -0.58454 |
| C         | 3.93190  | 0.60065  | 0.85507  |
| H         | 1.90951  | 1.17038  | 1.30261  |
| C         | 4.21048  | -1.38010 | -0.51086 |
| H         | 2.38724  | -2.34964 | -1.14127 |
| C         | 4.77007  | -0.31624 | 0.20779  |
| H         | 4.35854  | 1.42140  | 1.42568  |
| H         | 4.85414  | -2.09653 | -1.01468 |
| H         | 5.84964  | -0.20422 | 0.26638  |
| C         | -0.21155 | 1.53741  | -0.56056 |
| O         | 0.68073  | 1.75186  | -1.36609 |
| C         | -1.08637 | 2.61345  | 0.00706  |
| C         | -1.48613 | 3.58259  | -0.83290 |
| H         | -2.10974 | 4.40350  | -0.48866 |
| H         | -1.21246 | 3.56767  | -1.88423 |
| C         | -1.41042 | 2.59436  | 1.48431  |
| H         | -0.49380 | 2.67650  | 2.07947  |
| H         | -2.05714 | 3.43720  | 1.73931  |
| H         | -1.91151 | 1.67261  | 1.79205  |
| <b>5</b>  |          |          |          |
| C         | 1.43745  | -0.39179 | 0.01769  |
| C         | 0.00008  | 0.00002  | -0.17487 |
| H         | 1.65422  | -1.37390 | -0.41943 |
| H         | 2.12259  | 0.34032  | -0.42646 |
| H         | 1.69990  | -0.45905 | 1.08972  |

|            |          |          |          |
|------------|----------|----------|----------|
| C          | -0.37936 | 1.44055  | 0.01769  |
| C          | -1.05807 | -1.04872 | 0.01770  |
| H          | -1.35831 | 1.66595  | -0.42207 |
| H          | -0.44760 | 1.70263  | 1.08973  |
| H          | 0.35999  | 2.11964  | -0.42385 |
| H          | -1.25167 | -1.23930 | 1.08959  |
| H          | -2.01554 | -0.74742 | -0.42412 |
| H          | -0.76414 | -2.00921 | -0.42238 |
| <b>TS1</b> |          |          |          |
| C          | 2.06031  | -1.30829 | -0.05277 |
| C          | 3.27973  | -0.60302 | 0.07794  |
| C          | 4.49946  | -1.29604 | 0.12285  |
| C          | 4.46605  | -2.68674 | 0.01323  |
| C          | 3.24434  | -3.37653 | -0.14620 |
| C          | 2.02110  | -2.70121 | -0.18740 |
| C          | 1.73331  | 0.90603  | 0.01997  |
| H          | 5.43768  | -0.75790 | 0.22973  |
| H          | 5.39447  | -3.25098 | 0.04241  |
| H          | 3.25203  | -4.45912 | -0.24080 |
| H          | 1.09141  | -3.24485 | -0.32394 |
| N          | 1.06350  | -0.32104 | -0.07046 |
| N          | 3.03865  | 0.76407  | 0.13157  |
| C          | 1.05505  | 2.21413  | 0.07541  |
| C          | -0.16361 | 2.39259  | 0.75349  |
| C          | 1.67459  | 3.32733  | -0.52189 |
| C          | -0.75543 | 3.65659  | 0.82380  |
| H          | -0.64170 | 1.55371  | 1.25096  |
| C          | 1.07837  | 4.58883  | -0.45458 |
| H          | 2.61747  | 3.19437  | -1.04400 |
| C          | -0.13946 | 4.75815  | 0.21699  |
| H          | -1.69355 | 3.78149  | 1.35822  |
| H          | 1.56263  | 5.43922  | -0.92773 |
| H          | -0.60249 | 5.74013  | 0.27003  |
| C          | -0.28820 | -0.53246 | -0.56589 |
| O          | -0.64710 | 0.09429  | -1.55947 |
| C          | -1.10330 | -1.50996 | 0.16849  |
| C          | -2.16858 | -2.05597 | -0.49307 |
| H          | -2.72492 | -2.87748 | -0.05514 |
| H          | -2.31714 | -1.85691 | -1.54889 |
| C          | -0.80499 | -1.83352 | 1.61715  |
| H          | -1.50069 | -2.59304 | 1.98234  |

|          |          |          |          |
|----------|----------|----------|----------|
| H        | 0.21038  | -2.20914 | 1.77039  |
| H        | -0.91654 | -0.94693 | 2.25277  |
| C        | -3.94575 | 0.58280  | -0.12891 |
| C        | -4.36513 | -0.85778 | -0.08676 |
| H        | -3.23634 | 0.82173  | 0.66988  |
| H        | -3.49441 | 0.85166  | -1.08822 |
| H        | -4.82510 | 1.23425  | 0.01606  |
| C        | -5.09337 | -1.40550 | -1.28204 |
| C        | -4.73337 | -1.42120 | 1.25802  |
| H        | -5.11784 | -2.50092 | -1.28195 |
| H        | -6.14265 | -1.06374 | -1.27393 |
| H        | -4.65279 | -1.06390 | -2.22437 |
| H        | -5.70028 | -1.00402 | 1.58830  |
| H        | -4.84849 | -2.51004 | 1.23367  |
| H        | -3.99619 | -1.16250 | 2.02512  |
| <b>6</b> |          |          |          |
| C        | 2.02561  | -1.26242 | -0.06560 |
| C        | 3.22845  | -0.53475 | 0.09656  |
| C        | 4.45982  | -1.20691 | 0.15123  |
| C        | 4.45292  | -2.59618 | 0.02116  |
| C        | 3.24688  | -3.30699 | -0.16743 |
| C        | 2.01244  | -2.65376 | -0.21829 |
| C        | 1.64942  | 0.94011  | 0.04172  |
| H        | 5.38676  | -0.65452 | 0.28142  |
| H        | 5.39096  | -3.14389 | 0.05702  |
| H        | 3.27701  | -4.38771 | -0.27739 |
| H        | 1.09617  | -3.21370 | -0.37766 |
| N        | 1.01096  | -0.29819 | -0.07783 |
| N        | 2.95746  | 0.82534  | 0.16663  |
| C        | 0.93897  | 2.23124  | 0.08904  |
| C        | -0.29178 | 2.38156  | 0.75255  |
| C        | 1.53709  | 3.35742  | -0.50635 |
| C        | -0.91571 | 3.63109  | 0.81030  |
| H        | -0.75244 | 1.53518  | 1.25384  |
| C        | 0.90902  | 4.60373  | -0.45086 |
| H        | 2.48895  | 3.24572  | -1.01701 |
| C        | -0.32059 | 4.74500  | 0.20585  |
| H        | -1.86238 | 3.73487  | 1.33398  |
| H        | 1.37733  | 5.46420  | -0.92179 |
| H        | -0.80848 | 5.71530  | 0.24943  |
| C        | -0.33696 | -0.53703 | -0.57436 |

|            |          |          |          |
|------------|----------|----------|----------|
| O          | -0.66829 | -0.00764 | -1.64458 |
| C          | -1.19903 | -1.38880 | 0.20817  |
| C          | -2.47928 | -1.87062 | -0.41083 |
| H          | -2.63529 | -2.90342 | -0.07399 |
| H          | -2.35550 | -1.88966 | -1.49778 |
| C          | -0.81499 | -1.87480 | 1.57085  |
| H          | -1.66150 | -1.79780 | 2.25917  |
| H          | -0.56049 | -2.94359 | 1.53046  |
| H          | 0.03522  | -1.33936 | 1.99531  |
| C          | -4.13166 | -1.03783 | 1.39160  |
| C          | -3.81546 | -1.08852 | -0.11549 |
| H          | -4.13252 | -2.03848 | 1.83958  |
| H          | -3.41775 | -0.41551 | 1.94106  |
| H          | -5.12611 | -0.60449 | 1.54918  |
| C          | -3.75691 | 0.34405  | -0.67648 |
| C          | -4.93844 | -1.86620 | -0.83452 |
| H          | -3.55266 | 0.34336  | -1.75188 |
| H          | -4.71620 | 0.84932  | -0.51251 |
| H          | -2.97951 | 0.94108  | -0.18996 |
| H          | -5.90303 | -1.36721 | -0.68752 |
| H          | -4.75316 | -1.92688 | -1.91306 |
| H          | -5.02701 | -2.88806 | -0.44791 |
| <b>TS2</b> |          |          |          |
| C          | 2.45259  | 0.12385  | -0.04190 |
| C          | 2.72810  | 1.36219  | -0.67045 |
| C          | 3.96514  | 1.58039  | -1.29368 |
| C          | 4.89833  | 0.54186  | -1.27325 |
| C          | 4.60794  | -0.68916 | -0.64722 |
| C          | 3.37963  | -0.92203 | -0.01901 |
| C          | 0.72031  | 1.54859  | 0.10080  |
| H          | 4.18172  | 2.52857  | -1.77836 |
| H          | 5.86652  | 0.68118  | -1.74692 |
| H          | 5.35779  | -1.47580 | -0.64732 |
| H          | 3.16317  | -1.86560 | 0.46789  |
| N          | 1.13868  | 0.24447  | 0.43256  |
| N          | 1.63872  | 2.22337  | -0.55281 |
| C          | -0.60087 | 2.00669  | 0.50435  |
| C          | -1.21761 | 1.34549  | 1.63387  |
| C          | -1.32000 | 2.91758  | -0.26874 |
| C          | -2.56626 | 1.71865  | 1.95597  |
| H          | -0.58219 | 1.09611  | 2.48206  |

|          |          |          |          |
|----------|----------|----------|----------|
| C        | -2.64983 | 3.22767  | 0.05088  |
| H        | -0.84670 | 3.36238  | -1.13973 |
| C        | -3.26945 | 2.60910  | 1.15965  |
| H        | -3.02812 | 1.30491  | 2.84793  |
| H        | -3.20330 | 3.93676  | -0.55791 |
| H        | -4.29505 | 2.86547  | 1.41374  |
| C        | 0.38263  | -0.75833 | 1.10344  |
| O        | 0.98028  | -1.62719 | 1.73305  |
| C        | -1.10478 | -0.65987 | 1.03499  |
| C        | -1.75627 | -0.66386 | -0.34562 |
| H        | -1.17831 | -0.01190 | -1.00614 |
| H        | -2.74489 | -0.19851 | -0.24436 |
| C        | -1.79317 | -1.41051 | 2.15375  |
| H        | -2.87445 | -1.25818 | 2.11163  |
| H        | -1.59964 | -2.48642 | 2.08710  |
| H        | -1.43198 | -1.08601 | 3.13516  |
| C        | -2.36178 | -1.62668 | -2.55813 |
| C        | -1.95230 | -2.01465 | -1.11848 |
| H        | -3.27682 | -1.02250 | -2.56284 |
| H        | -1.57390 | -1.04898 | -3.05518 |
| H        | -2.55033 | -2.52353 | -3.15931 |
| C        | -0.65006 | -2.83613 | -1.17838 |
| C        | -3.08467 | -2.87522 | -0.51911 |
| H        | -0.34290 | -3.19305 | -0.19022 |
| H        | -0.78777 | -3.71604 | -1.81758 |
| H        | 0.17536  | -2.24970 | -1.59977 |
| H        | -4.01448 | -2.30090 | -0.43194 |
| H        | -3.28493 | -3.73536 | -1.16877 |
| H        | -2.83725 | -3.26759 | 0.47011  |
| <b>7</b> |          |          |          |
| C        | 2.50231  | -0.12172 | 0.28821  |
| C        | 2.83416  | 1.04302  | -0.44758 |
| C        | 4.15036  | 1.24834  | -0.88819 |
| C        | 5.10238  | 0.27386  | -0.58057 |
| C        | 4.75591  | -0.88144 | 0.14984  |
| C        | 3.44669  | -1.10182 | 0.59796  |
| C        | 0.72082  | 1.23101  | -0.02128 |
| H        | 4.41202  | 2.13973  | -1.45176 |
| H        | 6.12976  | 0.40576  | -0.90975 |
| H        | 5.52082  | -1.62067 | 0.37201  |
| H        | 3.18087  | -1.99020 | 1.15665  |

|             |          |          |          |
|-------------|----------|----------|----------|
| N           | 1.12862  | 0.00745  | 0.56373  |
| N           | 1.72054  | 1.85359  | -0.62485 |
| C           | -0.63615 | 1.65277  | 0.10614  |
| C           | -1.48864 | 0.90276  | 1.10494  |
| C           | -1.11842 | 2.78542  | -0.55216 |
| C           | -2.94383 | 1.28631  | 1.02688  |
| H           | -1.14908 | 1.28978  | 2.08741  |
| C           | -2.45238 | 3.17597  | -0.43135 |
| H           | -0.44225 | 3.34483  | -1.19279 |
| C           | -3.36576 | 2.38448  | 0.34042  |
| H           | -3.65687 | 0.70913  | 1.60819  |
| H           | -2.81132 | 4.05397  | -0.96022 |
| H           | -4.41733 | 2.66053  | 0.36037  |
| C           | 0.28254  | -0.96883 | 1.09808  |
| O           | 0.74266  | -2.04925 | 1.44837  |
| C           | -1.21677 | -0.64363 | 1.22146  |
| C           | -2.03820 | -1.59440 | 0.27206  |
| H           | -3.09170 | -1.41715 | 0.51807  |
| H           | -1.81527 | -2.60011 | 0.64477  |
| C           | -1.61094 | -1.06836 | 2.66522  |
| H           | -2.67448 | -0.88469 | 2.83953  |
| H           | -1.41962 | -2.13118 | 2.82079  |
| H           | -1.04210 | -0.50478 | 3.41189  |
| C           | -2.51659 | -0.43742 | -1.99388 |
| C           | -1.93937 | -1.67664 | -1.28322 |
| H           | -3.54487 | -0.23883 | -1.67272 |
| H           | -1.92523 | 0.46157  | -1.80818 |
| H           | -2.53119 | -0.60053 | -3.07841 |
| C           | -0.50553 | -1.93975 | -1.78709 |
| C           | -2.81070 | -2.89477 | -1.67926 |
| H           | -0.04807 | -2.79314 | -1.27474 |
| H           | -0.52292 | -2.16553 | -2.85961 |
| H           | 0.14770  | -1.07213 | -1.65686 |
| H           | -3.84482 | -2.77432 | -1.33562 |
| H           | -2.83205 | -3.01221 | -2.76856 |
| H           | -2.41880 | -3.82401 | -1.24940 |
| <b>TS2'</b> |          |          |          |
| C           | -0.09981 | 1.71305  | -0.71543 |
| C           | -0.96442 | 2.60572  | -0.10621 |
| C           | -0.46739 | 3.87544  | 0.28129  |
| C           | 0.91620  | 4.08567  | 0.11061  |

|   |          |          |          |
|---|----------|----------|----------|
| C | 1.77986  | 3.14156  | -0.47002 |
| C | 1.29991  | 1.86039  | -0.92870 |
| C | -1.99790 | 0.68247  | -0.16512 |
| H | -1.10026 | 4.62839  | 0.74147  |
| H | 1.33429  | 5.04263  | 0.41448  |
| H | 2.82145  | 3.40586  | -0.63102 |
| H | 1.77323  | 1.44507  | -1.81726 |
| N | -0.69442 | 0.46245  | -0.69812 |
| N | -2.17029 | 1.94675  | 0.16776  |
| C | -3.02310 | -0.35943 | -0.04803 |
| C | -3.01679 | -1.50177 | -0.87025 |
| C | -4.06646 | -0.19065 | 0.88539  |
| C | -4.03284 | -2.45543 | -0.75740 |
| H | -2.22600 | -1.63868 | -1.59963 |
| C | -5.07621 | -1.14672 | 0.99521  |
| H | -4.07173 | 0.68923  | 1.52151  |
| C | -5.06347 | -2.28359 | 0.17408  |
| H | -4.02133 | -3.33089 | -1.40150 |
| H | -5.87249 | -1.00890 | 1.72214  |
| H | -5.85136 | -3.02756 | 0.25996  |
| C | 0.28654  | -0.55930 | -0.41113 |
| O | 0.05307  | -1.74738 | -0.51066 |
| C | 1.60320  | 0.06468  | 0.04205  |
| C | 2.88089  | -0.53435 | -0.53842 |
| H | 3.58587  | 0.30014  | -0.65466 |
| H | 2.64972  | -0.87231 | -1.55572 |
| C | 1.56315  | 0.46256  | 1.50887  |
| H | 1.53786  | -0.42040 | 2.15811  |
| H | 2.44875  | 1.04987  | 1.76587  |
| H | 0.67958  | 1.06372  | 1.74347  |
| C | 4.41090  | -1.19039 | 1.43457  |
| C | 3.68702  | -1.68358 | 0.16240  |
| H | 5.00488  | -0.29108 | 1.23275  |
| H | 3.72038  | -0.96245 | 2.24990  |
| H | 5.09586  | -1.96555 | 1.79810  |
| C | 2.81436  | -2.90471 | 0.50608  |
| C | 4.76628  | -2.11980 | -0.85611 |
| H | 2.31331  | -3.30034 | -0.38261 |
| H | 3.43812  | -3.70137 | 0.92962  |
| H | 2.03939  | -2.66200 | 1.23928  |
| H | 5.40231  | -2.90437 | -0.43040 |

|           |          |          |          |
|-----------|----------|----------|----------|
| H         | 4.31344  | -2.51542 | -1.77269 |
| H         | 5.41363  | -1.27986 | -1.13572 |
| <b>7'</b> |          |          |          |
| C         | -0.11114 | 1.61802  | -0.65850 |
| C         | -1.01697 | 2.58244  | -0.31035 |
| C         | -0.51002 | 3.87974  | 0.01178  |
| C         | 0.91198  | 3.98552  | 0.11252  |
| C         | 1.80743  | 2.95325  | -0.12347 |
| C         | 1.35349  | 1.61330  | -0.66226 |
| C         | -2.06307 | 0.65934  | -0.21414 |
| H         | -1.15335 | 4.71406  | 0.27244  |
| H         | 1.32115  | 4.94603  | 0.41946  |
| H         | 2.87344  | 3.13708  | -0.01632 |
| H         | 1.75003  | 1.50285  | -1.68611 |
| N         | -0.70542 | 0.38474  | -0.54476 |
| N         | -2.25756 | 1.96147  | -0.09481 |
| C         | -3.10487 | -0.36338 | -0.08222 |
| C         | -2.96942 | -1.63901 | -0.66162 |
| C         | -4.28961 | -0.05030 | 0.61597  |
| C         | -3.99599 | -2.58027 | -0.54184 |
| H         | -2.06848 | -1.89305 | -1.20943 |
| C         | -5.30985 | -0.99431 | 0.73398  |
| H         | -4.39730 | 0.93255  | 1.06455  |
| C         | -5.16763 | -2.26414 | 0.15591  |
| H         | -3.88118 | -3.56021 | -0.99793 |
| H         | -6.21584 | -0.74268 | 1.27933  |
| H         | -5.96352 | -2.99869 | 0.24847  |
| C         | 0.29820  | -0.56116 | -0.13565 |
| O         | 0.08210  | -1.73149 | 0.08655  |
| C         | 1.64375  | 0.22172  | 0.06923  |
| C         | 2.87633  | -0.45260 | -0.60614 |
| H         | 3.57331  | 0.36960  | -0.81152 |
| H         | 2.53818  | -0.79363 | -1.59308 |
| C         | 1.74906  | 0.44909  | 1.59414  |
| H         | 1.77355  | -0.49856 | 2.13573  |
| H         | 2.65536  | 1.01199  | 1.82878  |
| H         | 0.89409  | 1.02650  | 1.96178  |
| C         | 4.60031  | -1.09935 | 1.20144  |
| C         | 3.74749  | -1.59363 | 0.01026  |
| H         | 5.14816  | -0.18429 | 0.94619  |
| H         | 4.00334  | -0.89784 | 2.09357  |



|   |         |          |          |
|---|---------|----------|----------|
| H | 5.33885 | -1.86309 | 1.47192  |
| C | 2.94633 | -2.83939 | 0.43375  |
| C | 4.72462 | -2.01225 | -1.11644 |
| H | 2.35105 | -3.23303 | -0.39644 |
| H | 3.63525 | -3.62799 | 0.76033  |
| H | 2.25978 | -2.63016 | 1.25765  |
| H | 5.41016 | -2.79043 | -0.76206 |
| H | 4.18530 | -2.41056 | -1.98379 |
| H | 5.33024 | -1.16384 | -1.45713 |
